# Supplementary material for: Identification of a Novel Four-Gene Signature Correlated With the Prognosis of Patients With Hepatocellular Carcinoma: A Comprehensive Analysis
Source: Front Oncol. 2021 Mar 12;11:626654. doi: 10.3389/fonc.2021.626654 (PMC7994902; doi:10.3389/fonc.2021.626654)
Supplement: Supplementary Table 2 — The differentially expressed genes (DEGs) in TCGA-LIHC dataset. [file Table_2.xlsx]

## Sheet: Table S2 TCGA_DEGs
id	logFC	AveExpr	t	P.Value	adj.P.Val	B
CLEC4M	-7.6688	-2.06586	-29.0289	5.54e-103	7.71e-99	223.929
CLEC1B	-6.95108	-1.99268	-26.5052	3.83e-92	2.67e-88	199.218
CLEC4G	-7.69102	-0.765693	-25.82	3.74e-89	1.74e-85	192.397
GDF2	-7.09332	-2.20079	-25.1701	2.66e-86	9.27e-83	185.889
STAB2	-5.92469	-0.458805	-23.8707	1.48e-80	4.13e-77	172.775
BMPER	-5.46131	-1.32729	-23.7825	3.66e-80	8.49e-77	171.88
INS-IGF2	-5.90892	-2.31437	-21.1807	1.57e-68	3.12e-65	145.315
GABRD	3.86011	0.996375	21.1644	1.86e-68	3.23e-65	145.148
FCN2	-6.91539	-0.302974	-20.6245	4.94e-66	7.64e-63	139.609
CRHBP	-6.2278	0.601633	-20.4774	2.26e-65	3.15e-62	138.1
ADAMTS13	-3.07128	2.59046	-20.4418	3.27e-65	4.14e-62	137.734
PLVAP	2.79927	6.00927	20.0932	1.2e-63	1.39e-60	134.158
MARCO	-6.86666	0.240794	-19.9678	4.39e-63	4.71e-60	132.871
FCN3	-5.72352	1.96821	-19.6137	1.71e-61	1.7e-58	129.24
ECM1	-3.65912	2.69985	-19.1606	1.84e-59	1.7e-56	124.598
COLEC10	-5.4692	-0.0259742	-18.8417	4.92e-58	4.28e-55	121.335
CFP	-3.9891	1.63654	-18.6318	4.27e-57	3.5e-54	119.19
CXorf36	2.20325	2.80165	18.536	1.14e-56	8.86e-54	118.211
UBE2T	3.06413	2.34836	18.5019	1.62e-56	1.17e-53	117.864
CCBE1	-4.84198	-1.01489	-18.4989	1.68e-56	1.17e-53	117.832
CSRNP1	-2.34447	4.75937	-17.7284	4.55e-53	3.02e-50	109.987
ARHGEF39	2.68094	1.65254	17.6135	1.47e-52	9.32e-50	108.821
PTH1R	-4.01811	1.09817	-17.5976	1.73e-52	1.05e-49	108.659
HIGD1B	2.58381	-0.416981	17.5199	3.83e-52	2.22e-49	107.872
MELK	3.61178	1.73573	17.5151	4.02e-52	2.24e-49	107.824
CXCL14	-6.17343	-0.146394	-17.5076	4.34e-52	2.33e-49	107.748
VIPR1	-4.44551	0.991438	-17.499	4.74e-52	2.45e-49	107.66
IQGAP3	3.85603	3.03816	17.4525	7.63e-52	3.79e-49	107.189
EBF2	3.32742	-0.715737	17.2726	4.78e-51	2.29e-48	105.369
HHIP	-5.70876	-0.895067	-17.1878	1.13e-50	5.26e-48	104.511
SLC26A6	2.41479	3.92131	17.1571	1.55e-50	6.96e-48	104.201
CDC25C	3.79355	1.08827	17.1222	2.21e-50	9.61e-48	103.849
KCNN2	-4.59225	-0.259568	-17.1191	2.28e-50	9.62e-48	103.817
NCAPG	3.65304	2.18131	17.0997	2.78e-50	1.14e-47	103.622
CDKN3	3.48694	2.09479	17.0814	3.35e-50	1.33e-47	103.437
OIT3	-3.64438	3.25257	-17.0743	3.6e-50	1.39e-47	103.365
ANGPTL6	-3.49177	1.43279	-16.8981	2.16e-49	8.11e-47	101.588
MXD3	2.47736	2.69381	16.8507	3.48e-49	1.28e-46	101.112
SKA1	3.80811	1.17108	16.778	7.29e-49	2.6e-46	100.38
HJURP	3.59978	1.90734	16.7663	8.2e-49	2.85e-46	100.262
MND1	2.88486	0.592022	16.6917	1.75e-48	5.93e-46	99.5118
NUF2	3.63438	1.53834	16.6335	3.15e-48	1.04e-45	98.928
CDCA5	3.13401	2.7191	16.6292	3.29e-48	1.06e-45	98.8849
CENPF	3.54565	3.45113	16.6189	3.65e-48	1.15e-45	98.7811
NEK2	3.69691	1.89348	16.5685	6.07e-48	1.88e-45	98.2756
ASPM	3.56809	3.19593	16.5044	1.16e-47	3.44e-45	97.6321
PRC1	2.97443	3.30628	16.5043	1.16e-47	3.44e-45	97.6315
COL15A1	3.45556	3.47548	16.5008	1.2e-47	3.49e-45	97.5961
LYVE1	-3.75743	1.51928	-16.467	1.69e-47	4.81e-45	97.2581
RCAN1	-2.58432	5.39187	-16.4385	2.26e-47	6.29e-45	96.972
GPM6A	-4.32601	-0.542542	-16.3974	3.42e-47	9.33e-45	96.5608
CDH13	2.3071	2.61417	16.304	8.77e-47	2.35e-44	95.6263
NDC80	3.03582	2.0517	16.2829	1.08e-46	2.85e-44	95.4152
PZP	-5.37359	0.647117	-16.2385	1.7e-46	4.37e-44	94.9719
EXO1	3.28653	1.25244	16.1921	2.71e-46	6.85e-44	94.5084
CDK1	3.29998	2.88078	16.1838	2.94e-46	7.31e-44	94.4258
CCNB2	3.4397	2.27947	16.1818	3e-46	7.33e-44	94.4058
TOP2A	3.74415	4.21536	16.1642	3.58e-46	8.6e-44	94.2297
BIRC5	3.72318	3.37312	16.1556	3.91e-46	9.22e-44	94.144
E2F1	3.50662	3.22508	16.1427	4.44e-46	1.03e-43	94.0158
TROAP	3.6883	1.98794	16.0815	8.22e-46	1.88e-43	93.4056
LRAT	-3.39747	0.423112	-16.0761	8.68e-46	1.95e-43	93.3517
SPC24	3.14657	2.5669	15.9742	2.41e-45	5.33e-43	92.337
KIF4A	3.45173	2.34338	15.9241	3.99e-45	8.68e-43	91.8387
KIFC1	3.36986	2.85901	15.9188	4.21e-45	9.01e-43	91.7858
GPR182	-4.01596	-1.1316	-15.9113	4.53e-45	9.57e-43	91.7113
RSPO3	-4.45639	-1.37224	-15.9004	5.06e-45	1.05e-42	91.6029
KIF20A	3.47224	2.25396	15.8951	5.33e-45	1.09e-42	91.5503
PITPNM3	-3.54921	-0.754789	-15.8869	5.79e-45	1.17e-42	91.4693
TOMM40L	1.62257	4.67978	15.8842	5.95e-45	1.18e-42	91.442
VPS45	1.10087	4.5742	15.8578	7.75e-45	1.52e-42	91.1798
BUB1	3.24385	1.99057	15.7858	1.59e-44	3.08e-42	90.4658
C5orf34	2.12904	0.122987	15.7772	1.73e-44	3.31e-42	90.3798
HMMR	3.09154	2.19123	15.7692	1.88e-44	3.54e-42	90.3006
CDC20	3.80206	2.88808	15.6611	5.53e-44	1.03e-41	89.2294
SKA3	3.17829	1.09937	15.6187	8.44e-44	1.55e-41	88.8105
MAP2K1	-1.18537	5.18946	-15.6153	8.73e-44	1.58e-41	88.777
UBE2C	3.70204	2.63882	15.5796	1.25e-43	2.23e-41	88.4232
PBK	3.315	1.49367	15.5566	1.57e-43	2.76e-41	88.196
CETP	-3.16114	2.06785	-15.544	1.78e-43	3.09e-41	88.0721
RACGAP1	2.24221	3.25101	15.5417	1.82e-43	3.12e-41	88.0495
THY1	2.61614	4.89081	15.5375	1.89e-43	3.22e-41	88.008
ANLN	3.42916	2.41037	15.5194	2.27e-43	3.81e-41	87.8285
CCNB1	2.93009	3.50946	15.4897	3.05e-43	5.06e-41	87.5352
LIFR	-3.50225	2.97109	-15.4694	3.73e-43	6.11e-41	87.3356
CD34	1.99642	4.90857	15.4477	4.63e-43	7.5e-41	87.1211
DLGAP5	3.27386	1.51189	15.4374	5.13e-43	8.21e-41	87.0197
CDC45	3.0368	1.67017	15.4253	5.79e-43	9.16e-41	86.9002
KIF2C	3.38042	2.159	15.4066	6.96e-43	1.09e-40	86.7165
EZH2	2.22172	2.95745	15.3904	8.19e-43	1.27e-40	86.5561
FBXO43	2.95764	-0.402771	15.3843	8.69e-43	1.32e-40	86.4969
RRM2	3.08349	3.90452	15.3843	8.7e-43	1.32e-40	86.4961
DTL	3.13517	2.47613	15.3717	9.86e-43	1.48e-40	86.372
FAM189B	1.58238	4.49205	15.355	1.16e-42	1.72e-40	86.2083
RND3	-2.6304	4.79075	-15.3251	1.57e-42	2.29e-40	85.9132
PKMYT1	2.83612	1.71953	15.2952	2.1e-42	3.05e-40	85.6197
CENPL	2.10914	1.52861	15.2706	2.69e-42	3.82e-40	85.3774
DBH	-3.93747	1.62975	-15.2695	2.71e-42	3.82e-40	85.367
MT1H	-6.69692	0.561826	-15.2693	2.72e-42	3.82e-40	85.3651
AURKA	2.51275	3.46983	15.2605	2.97e-42	4.13e-40	85.2786
SPC25	2.84274	0.827615	15.2274	4.12e-42	5.65e-40	84.9534
FOXM1	3.30211	2.97252	15.227	4.14e-42	5.65e-40	84.9493
KIF18B	3.46676	1.4571	15.1906	5.93e-42	8.01e-40	84.592
CDCA8	2.83906	2.16851	15.1893	6.01e-42	8.04e-40	84.5792
CDC6	3.03164	2.72806	15.1302	1.08e-41	1.43e-39	83.999
CPEB3	-2.58168	3.16758	-15.1179	1.22e-41	1.6e-39	83.8786
TTK	3.34572	1.23288	15.0894	1.61e-41	2.1e-39	83.599
AADAT	-3.49392	2.41373	-15.0844	1.69e-41	2.18e-39	83.5509
CDCA3	2.89144	1.98237	15.0816	1.74e-41	2.22e-39	83.5231
ESM1	3.85538	2.05784	15.08	1.77e-41	2.24e-39	83.5073
DEPDC1	3.4403	1.16139	15.0628	2.1e-41	2.63e-39	83.3386
CDT1	3.1502	2.60147	15.0153	3.35e-41	4.16e-39	82.8746
TMEM120B	1.21483	2.99428	15.0117	3.47e-41	4.28e-39	82.8389
TRIB1	-2.11203	6.36504	-14.9712	5.18e-41	6.32e-39	82.4426
MKI67	3.22432	3.89698	14.9474	6.54e-41	7.92e-39	82.2108
TUBE1	-1.99463	3.09274	-14.937	7.25e-41	8.7e-39	82.1088
NOX4	2.30848	-0.195104	14.9327	7.56e-41	9e-39	82.0668
PTTG1	3.27634	2.97419	14.9285	7.87e-41	9.29e-39	82.0263
APLN	3.41004	1.83061	14.8631	1.5e-40	1.75e-38	81.3876
MSTO1	1.56935	3.28932	14.8551	1.62e-40	1.88e-38	81.3098
OLFML2B	2.72861	2.27358	14.8289	2.1e-40	2.41e-38	81.0545
BUB1B	3.20815	1.54598	14.7147	6.43e-40	7.34e-38	79.943
CENPA	3.27538	0.534067	14.7025	7.25e-40	8.21e-38	79.8241
TRAIP	2.45367	1.1798	14.6563	1.14e-39	1.28e-37	79.3755
CCNA2	3.06346	2.51095	14.6557	1.15e-39	1.28e-37	79.3701
TRIP13	2.88674	1.43282	14.6513	1.2e-39	1.32e-37	79.3273
CENPE	2.8122	1.47125	14.6416	1.32e-39	1.44e-37	79.2331
TIMD4	-3.92278	-1.26365	-14.6278	1.51e-39	1.64e-37	79.0988
SPATS2	1.48301	3.66728	14.6215	1.6e-39	1.73e-37	79.0382
EME1	2.66718	0.398604	14.6204	1.62e-39	1.73e-37	79.0275
CEP131	1.65777	3.40567	14.5933	2.11e-39	2.24e-37	78.7648
ZFP36	-2.20122	6.65775	-14.553	3.13e-39	3.3e-37	78.3739
MT1F	-5.26095	2.7717	-14.5209	4.28e-39	4.48e-37	78.0632
FLVCR1	2.01887	3.31158	14.5016	5.16e-39	5.37e-37	77.877
TNFRSF4	2.29263	1.19584	14.4882	5.89e-39	6.07e-37	77.7473
TBC1D16	1.66358	5.0397	14.4412	9.31e-39	9.53e-37	77.2927
PLK1	3.10612	2.4224	14.4383	9.57e-39	9.73e-37	77.2647
TICRR	3.07552	0.342473	14.3988	1.41e-38	1.42e-36	76.8837
FAM111B	2.96486	1.91963	14.3936	1.48e-38	1.48e-36	76.8334
ZFP1	-1.81094	2.60666	-14.3814	1.67e-38	1.66e-36	76.7158
RIPOR3	-3.20819	0.453837	-14.3644	1.97e-38	1.94e-36	76.5514
TCF19	2.57661	3.31943	14.3453	2.36e-38	2.32e-36	76.368
ORC1	2.71066	1.07854	14.3409	2.47e-38	2.4e-36	76.3251
HAMP	-6.83865	2.68164	-14.2956	3.83e-38	3.71e-36	75.8892
CYP26A1	-4.73871	-0.440062	-14.2905	4.03e-38	3.87e-36	75.84
SLC5A1	-4.69133	-1.49942	-14.2757	4.65e-38	4.43e-36	75.6978
DIRAS3	-3.78412	-0.540157	-14.2235	7.72e-38	7.31e-36	75.1951
DNASE1L3	-3.7727	3.33998	-14.2203	7.95e-38	7.48e-36	75.165
LRRC14	1.38828	4.4469	14.1796	1.18e-37	1.1e-35	74.7735
C1RL	-1.80296	6.83384	-14.1754	1.23e-37	1.14e-35	74.7333
AURKB	3.0094	1.95789	14.1487	1.59e-37	1.47e-35	74.4777
SFRP1	-3.75838	-0.658618	-14.1429	1.68e-37	1.54e-35	74.4223
CDC37L1	-1.6133	4.61465	-14.1208	2.08e-37	1.9e-35	74.2104
FOS	-3.62597	5.32996	-14.1182	2.14e-37	1.93e-35	74.1852
PAMR1	-2.68524	1.20425	-14.1115	2.28e-37	2.05e-35	74.1212
PLXDC1	2.47763	1.92408	14.1004	2.54e-37	2.26e-35	74.0147
CYP2C19	-3.7292	-1.13604	-14.0999	2.55e-37	2.26e-35	74.0093
TBXA2R	-2.06193	1.43184	-14.0968	2.63e-37	2.32e-35	73.9797
DSCC1	1.85322	1.41178	14.0825	3.02e-37	2.64e-35	73.8435
DCUN1D3	-1.23848	3.08561	-14.0666	3.52e-37	3.06e-35	73.6904
CENPM	3.09947	1.68226	14.0583	3.81e-37	3.29e-35	73.6116
CKAP2L	2.92281	1.29048	14.0426	4.44e-37	3.81e-35	73.4608
BCO2	-4.25506	1.6621	-14.0312	4.95e-37	4.23e-35	73.3518
EHD3	-2.31224	2.21292	-14.019	5.57e-37	4.72e-35	73.2358
CENPI	2.57562	0.22928	14.0015	6.59e-37	5.56e-35	73.0683
PLAC8	-3.36165	0.143914	-13.9804	8.08e-37	6.78e-35	72.8664
FOSB	-4.39513	3.04839	-13.9296	1.32e-36	1.1e-34	72.3822
GTSE1	2.97703	1.29764	13.9109	1.58e-36	1.31e-34	72.2036
TTC13	1.31855	3.59845	13.9087	1.61e-36	1.33e-34	72.1829
E2F8	3.22708	0.608371	13.9031	1.7e-36	1.39e-34	72.1293
NCAPH	2.61008	1.63872	13.8929	1.87e-36	1.52e-34	72.0325
MT1M	-5.62703	1.33918	-13.8886	1.95e-36	1.58e-34	71.9908
PARPBP	2.36713	0.988086	13.8534	2.74e-36	2.2e-34	71.6561
SYT9	-4.76141	-1.76935	-13.8323	3.35e-36	2.68e-34	71.4557
CHST4	-5.2113	-1.25017	-13.822	3.7e-36	2.95e-34	71.3569
CXCL12	-3.57583	4.79792	-13.8061	4.31e-36	3.41e-34	71.2065
IL13RA2	-3.58001	-1.25666	-13.7982	4.65e-36	3.66e-34	71.1309
JRK	1.64889	2.66683	13.791	4.98e-36	3.9e-34	71.0623
ADRA2B	-2.38636	0.692108	-13.778	5.64e-36	4.39e-34	70.9395
SPDL1	1.63741	2.25269	13.7393	8.17e-36	6.32e-34	70.572
MTFR2	2.531	-0.159201	13.7072	1.11e-35	8.55e-34	70.2673
NPY1R	-3.38881	0.522997	-13.7066	1.12e-35	8.55e-34	70.2614
KDM8	-3.01375	3.61056	-13.6996	1.19e-35	9.09e-34	70.1951
PYGO2	1.15715	5.4047	13.6838	1.39e-35	1.05e-33	70.0459
DIAPH3	2.83558	0.728906	13.6779	1.47e-35	1.11e-33	69.9898
ACADS	-1.9803	6.30022	-13.6771	1.48e-35	1.11e-33	69.9817
ZNF692	1.59072	3.93435	13.6375	2.16e-35	1.61e-33	69.6076
CDKN2A	3.60999	2.63883	13.5943	3.26e-35	2.42e-33	69.1985
KIF18A	2.77689	0.412928	13.5519	4.89e-35	3.6e-33	68.7987
RASL12	2.04203	1.16904	13.5487	5.04e-35	3.69e-33	68.768
C21orf91	-1.73259	2.48354	-13.5269	6.2e-35	4.52e-33	68.5626
TCIM	-2.7462	4.71897	-13.5137	7.03e-35	5.1e-33	68.4383
KIF23	2.86789	1.64179	13.5092	7.33e-35	5.29e-33	68.3963
ANKRD52	1.38579	4.59866	13.4849	9.25e-35	6.64e-33	68.1665
ORC6	2.49168	0.811216	13.4665	1.1e-34	7.86e-33	67.9932
FAM180A	-4.12932	-0.598239	-13.4633	1.13e-34	8.06e-33	67.9635
ZFP41	1.78318	2.85191	13.4454	1.34e-34	9.41e-33	67.7953
KIF14	2.68463	1.24469	13.4454	1.34e-34	9.41e-33	67.7952
NEIL3	3.05126	-0.262583	13.4454	1.34e-34	9.41e-33	67.7952
ADGRG7	-3.61364	1.00411	-13.4225	1.67e-34	1.16e-32	67.5795
NRBF2	-1.08244	4.3713	-13.4205	1.7e-34	1.18e-32	67.5606
CSPG4	2.09968	2.85609	13.4175	1.75e-34	1.21e-32	67.5323
COX4I2	2.48544	0.271826	13.4127	1.83e-34	1.26e-32	67.4874
TEDC2	2.47931	1.44402	13.3999	2.07e-34	1.41e-32	67.3677
ZWINT	2.32148	3.31708	13.3917	2.24e-34	1.52e-32	67.2906
ETFDH	-1.90989	5.50684	-13.3452	3.48e-34	2.35e-32	66.8538
TARBP1	1.64147	4.45798	13.3404	3.64e-34	2.45e-32	66.8092
KAT2A	1.42079	5.37477	13.3338	3.87e-34	2.59e-32	66.7469
STIL	2.10795	1.46357	13.3218	4.33e-34	2.89e-32	66.6349
IGFBP3	-2.55992	6.98764	-13.2869	6.03e-34	4e-32	66.3071
GMNN	1.95641	4.65274	13.271	7.01e-34	4.6e-32	66.1586
MYBL2	3.66659	2.89573	13.2637	7.51e-34	4.88e-32	66.0906
C21orf58	2.0446	1.3405	13.2637	7.51e-34	4.88e-32	66.0905
ASF1B	2.60412	2.2736	13.2441	9.03e-34	5.85e-32	65.9073
LCAT	-3.34639	5.00151	-13.2386	9.51e-34	6.13e-32	65.8557
ABCC10	1.2839	3.44096	13.2017	1.35e-33	8.64e-32	65.5111
TBC1D31	1.32166	2.22342	13.1517	2.16e-33	1.38e-31	65.0444
DUSP6	-1.83691	5.75976	-13.1486	2.22e-33	1.41e-31	65.0152
XRCC2	2.49341	0.44114	13.1425	2.35e-33	1.49e-31	64.9586
RASD2	2.16031	-0.13375	13.142	2.36e-33	1.49e-31	64.9542
ETS2	-1.76577	7.23815	-13.1413	2.38e-33	1.49e-31	64.9471
CCNF	1.97224	2.4558	13.1221	2.85e-33	1.78e-31	64.7682
CELSR3	2.90208	1.69571	13.1123	3.12e-33	1.94e-31	64.6776
FANCI	2.05865	2.98116	13.0999	3.51e-33	2.17e-31	64.5623
EHMT2	1.278	5.37475	13.0777	4.32e-33	2.66e-31	64.3554
UCK2	1.51467	4.5327	13.0719	4.56e-33	2.8e-31	64.3017
USP21	1.11656	3.65595	13.0625	4.99e-33	3.05e-31	64.2136
CYP1A2	-7.58042	2.27339	-13.0506	5.57e-33	3.39e-31	64.1038
CD4	-2.20984	5.22733	-13.0281	6.88e-33	4.17e-31	63.8944
SMG5	1.30133	6.75292	13.0167	7.66e-33	4.62e-31	63.7887
ARHGAP11A	2.27557	2.24281	13.0157	7.73e-33	4.64e-31	63.779
USP49	1.21706	1.80162	13.0133	7.9e-33	4.72e-31	63.7574
EGR1	-3.02701	6.13095	-12.9956	9.33e-33	5.54e-31	63.5931
SGO1	2.53139	0.689894	12.9945	9.43e-33	5.56e-31	63.5822
PHLDA1	-2.60343	5.60551	-12.9878	1e-32	5.9e-31	63.5205
SGO2	2.12096	1.39965	12.9833	1.05e-32	6.13e-31	63.4786
MRO	-2.75366	0.632969	-12.977	1.11e-32	6.47e-31	63.4204
UHRF1	2.88427	1.49001	12.9752	1.13e-32	6.55e-31	63.4032
PLSCR4	-2.1779	3.86039	-12.9585	1.32e-32	7.63e-31	63.2486
TONSL	1.72311	3.44529	12.9554	1.36e-32	7.82e-31	63.2203
ADRA1A	-4.54906	1.24504	-12.939	1.58e-32	9.06e-31	63.0679
POLQ	2.61321	0.57485	12.9387	1.59e-32	9.06e-31	63.0658
SFRP5	-5.70564	-0.767205	-12.9347	1.65e-32	9.37e-31	63.0286
SIGLEC7	-2.26456	-0.104148	-12.9244	1.82e-32	1.03e-30	62.9332
NAAA	-1.89796	3.9632	-12.9157	1.97e-32	1.11e-30	62.8527
CNDP1	-5.50098	0.779391	-12.8843	2.64e-32	1.48e-30	62.562
RECQL4	2.283	3.56396	12.8822	2.69e-32	1.5e-30	62.5431
ERCC6L	2.43778	-0.224963	12.8802	2.74e-32	1.52e-30	62.5247
XRCC3	1.48936	2.47551	12.8711	2.99e-32	1.65e-30	62.4401
KMT5C	1.40677	2.70593	12.8704	3.01e-32	1.65e-30	62.4336
SPRY2	-1.58944	3.36329	-12.848	3.7e-32	2.03e-30	62.2271
TMEM206	1.262	1.78285	12.8468	3.74e-32	2.04e-30	62.2164
CEP250	1.06605	4.32546	12.8253	4.57e-32	2.49e-30	62.018
MT1G	-6.41149	4.14305	-12.8201	4.8e-32	2.6e-30	61.97
SHCBP1	2.72813	0.91142	12.8148	5.04e-32	2.72e-30	61.9209
GSTZ1	-2.44266	4.92692	-12.7941	6.11e-32	3.29e-30	61.7298
CLTRN	-3.6676	1.25976	-12.7897	6.37e-32	3.41e-30	61.6899
DENND4B	1.0481	4.92865	12.7806	6.93e-32	3.7e-30	61.6058
IL1RAP	-2.26464	4.60798	-12.7647	8.03e-32	4.27e-30	61.4596
MCM10	2.74481	0.890113	12.7542	8.86e-32	4.69e-30	61.3627
AP5Z1	1.06041	4.91667	12.7327	1.08e-31	5.68e-30	61.165
ITGA9	-2.22804	3.09086	-12.7217	1.2e-31	6.27e-30	61.0636
E2F2	2.54612	0.532914	12.7061	1.38e-31	7.21e-30	60.921
RAD54L	2.75251	0.206809	12.6759	1.83e-31	9.51e-30	60.6434
FOXO1	-1.84457	4.49969	-12.6276	2.86e-31	1.48e-29	60.2009
THBS4	4.09898	2.1079	12.6258	2.91e-31	1.49e-29	60.1841
SMPD3	-2.34207	0.437215	-12.5919	3.98e-31	2.04e-29	59.8735
MYD88	-1.09305	5.39923	-12.5914	4e-31	2.04e-29	59.869
STMN1	1.8763	5.61947	12.5614	5.27e-31	2.68e-29	59.5954
CDCA2	2.64722	0.264517	12.5534	5.68e-31	2.87e-29	59.5217
SEMA3F	1.17544	4.03961	12.5391	6.47e-31	3.24e-29	59.3916
MT2A	-3.76167	7.74678	-12.5296	7.07e-31	3.53e-29	59.3046
LILRA5	-2.34403	-0.113486	-12.5215	7.62e-31	3.79e-29	59.2305
KIAA1841	1.42403	1.63267	12.5175	7.9e-31	3.92e-29	59.1942
PTGS2	-2.85913	-0.712251	-12.5111	8.38e-31	4.14e-29	59.1362
HDAC11	1.60315	4.04196	12.5107	8.41e-31	4.14e-29	59.1325
HGF	-3.4065	1.95737	-12.5028	9.05e-31	4.44e-29	59.0598
PEA15	1.10996	6.52106	12.5008	9.21e-31	4.5e-29	59.0419
IGFALS	-4.79514	3.05942	-12.4958	9.64e-31	4.7e-29	58.9967
ERLIN1	-1.39535	5.89628	-12.4821	1.09e-30	5.31e-29	58.8713
FAAP24	1.3903	0.944811	12.4796	1.12e-30	5.41e-29	58.849
ZIC2	4.48842	0.51315	12.4722	1.2e-30	5.76e-29	58.7813
ESR1	-3.8826	1.85667	-12.4622	1.31e-30	6.29e-29	58.69
AGL	-1.70731	4.84057	-12.4368	1.66e-30	7.91e-29	58.4591
MPC1	-1.77858	6.01277	-12.4303	1.76e-30	8.37e-29	58.4002
GINS1	2.43548	2.23706	12.4275	1.81e-30	8.56e-29	58.3742
MCM2	2.23244	4.23185	12.4197	1.94e-30	9.16e-29	58.3039
SLITRK3	-4.46422	-1.78444	-12.4175	1.98e-30	9.32e-29	58.2837
SLC39A14	-1.85633	8.02823	-12.4158	2.01e-30	9.43e-29	58.2684
CHAF1A	1.39363	3.66936	12.3899	2.55e-30	1.19e-28	58.0333
CENPW	2.17893	1.81623	12.3887	2.58e-30	1.2e-28	58.0221
LHX2	-2.67982	-0.71503	-12.3887	2.58e-30	1.2e-28	58.0221
KIF15	2.72921	0.798244	12.3771	2.87e-30	1.33e-28	57.9168
SOCS7	1.46169	2.75055	12.3765	2.88e-30	1.33e-28	57.9113
CENPH	1.66702	1.60614	12.3556	3.49e-30	1.61e-28	57.7214
SCAMP3	1.1768	6.38987	12.3539	3.55e-30	1.63e-28	57.7062
RFC4	1.54658	3.46254	12.348	3.75e-30	1.71e-28	57.6525
TMEM79	1.04734	2.40198	12.3454	3.84e-30	1.75e-28	57.629
NR2C2AP	1.24558	3.70861	12.3354	4.2e-30	1.91e-28	57.5385
NDRG2	-1.74547	7.26702	-12.3302	4.41e-30	1.99e-28	57.4916
INMT	-3.41408	2.22498	-12.3291	4.45e-30	2.01e-28	57.482
KHDC4	1.22922	4.35424	12.3277	4.51e-30	2.02e-28	57.4692
PLPP3	-1.85542	6.33819	-12.3254	4.6e-30	2.06e-28	57.4484
FAM83D	2.24083	2.84272	12.3203	4.83e-30	2.15e-28	57.4017
ST6GAL2	-3.39285	-1.01461	-12.3101	5.3e-30	2.35e-28	57.3091
CBFA2T2	1.15564	3.85591	12.3095	5.32e-30	2.35e-28	57.3045
CBFA2T3	-2.36276	1.16044	-12.2735	7.39e-30	3.26e-28	56.9789
MDK	3.2964	5.93441	12.2585	8.48e-30	3.72e-28	56.8432
CDKN2C	2.02252	3.44006	12.2583	8.49e-30	3.72e-28	56.8415
IQCC	1.35448	0.705885	12.2475	9.37e-30	4.09e-28	56.7438
NDUFA4L2	2.25022	3.74597	12.2426	9.8e-30	4.27e-28	56.6995
FITM1	-2.60465	0.390368	-12.2349	1.05e-29	4.56e-28	56.6297
ADCY6	1.16453	4.58505	12.23	1.1e-29	4.76e-28	56.5857
FEN1	1.47111	4.39777	12.2249	1.15e-29	4.97e-28	56.5391
DBF4B	1.43255	1.78094	12.2193	1.21e-29	5.21e-28	56.4889
KLHL15	-1.43372	3.35199	-12.214	1.27e-29	5.45e-28	56.4412
CENPK	2.31197	0.606942	12.2078	1.35e-29	5.75e-28	56.3853
SRPX	-3.31136	0.716653	-12.1799	1.73e-29	7.39e-28	56.1344
CEP55	2.53804	0.954288	12.1732	1.84e-29	7.81e-28	56.0732
MSH2	1.22229	3.67993	12.1682	1.93e-29	8.14e-28	56.0286
RNASEH2A	1.66475	3.79613	12.1673	1.95e-29	8.19e-28	56.02
LILRA2	-2.03328	-0.259179	-12.1559	2.16e-29	9.05e-28	55.9178
FREM2	-4.83516	-0.914044	-12.1517	2.24e-29	9.38e-28	55.8797
C1R	-2.15935	9.80287	-12.1437	2.41e-29	1.01e-27	55.8081
PRIM2	1.09927	2.69967	12.116	3.1e-29	1.28e-27	55.5591
SEMA5B	1.92973	1.47062	12.1149	3.13e-29	1.29e-27	55.5495
PIGC	1.00527	4.71379	12.1125	3.2e-29	1.32e-27	55.5277
EPHA2	-2.11167	4.21896	-12.1067	3.37e-29	1.39e-27	55.4759
GHR	-3.05667	5.10272	-12.098	3.65e-29	1.49e-27	55.3974
KCTD7	1.29421	2.29912	12.0952	3.74e-29	1.53e-27	55.3721
FRMD4B	-1.4318	3.99742	-12.0877	4.01e-29	1.63e-27	55.305
WDR66	-1.90264	-0.436	-12.0753	4.48e-29	1.82e-27	55.1942
CDH24	1.83972	1.08625	12.0521	5.53e-29	2.23e-27	54.9859
ZADH2	-1.1199	4.40567	-12.0273	6.92e-29	2.77e-27	54.7642
CTNNA3	-3.37793	-0.637118	-12.0093	8.14e-29	3.25e-27	54.603
MTBP	1.64193	0.851587	11.9975	9.06e-29	3.61e-27	54.4969
ZNF517	1.5376	3.48293	11.9934	9.4e-29	3.73e-27	54.461
OLFML2A	2.17115	2.65776	11.9659	1.21e-28	4.77e-27	54.2146
EGR2	-2.81068	0.915147	-11.9632	1.23e-28	4.87e-27	54.1907
GJC1	2.00848	1.46497	11.9627	1.24e-28	4.88e-27	54.1866
PPM1F	1.02479	4.53136	11.9608	1.26e-28	4.95e-27	54.1693
WDR62	2.12062	1.98564	11.9587	1.29e-28	5.03e-27	54.1509
ACAA2	-1.90918	7.86577	-11.9542	1.34e-28	5.22e-27	54.11
CYR61	-2.24612	5.19868	-11.9508	1.38e-28	5.37e-27	54.0799
MCM6	1.61415	4.40597	11.9428	1.48e-28	5.75e-27	54.0084
IL1RL1	-3.19457	-1.23278	-11.9425	1.49e-28	5.75e-27	54.0059
FXN	-1.32762	3.45105	-11.932	1.63e-28	6.29e-27	53.9126
RAD54B	1.49888	0.383924	11.9242	1.75e-28	6.73e-27	53.8433
NAT2	-4.59656	1.44942	-11.9217	1.79e-28	6.86e-27	53.8206
KAZN	-2.39089	0.533329	-11.9214	1.8e-28	6.86e-27	53.8181
RASGEF1B	-2.12806	3.79902	-11.9191	1.84e-28	6.99e-27	53.7972
CENPU	2.01212	2.55596	11.9132	1.94e-28	7.35e-27	53.745
GABRP	-3.47675	-1.60197	-11.9075	2.04e-28	7.71e-27	53.6944
CD5L	-4.9494	1.7674	-11.9056	2.07e-28	7.82e-27	53.6773
KBTBD11	-3.59467	1.35862	-11.902	2.14e-28	8.05e-27	53.6452
E2F7	2.67804	-0.168067	11.9019	2.14e-28	8.05e-27	53.6441
MT1E	-4.86729	4.9132	-11.8968	2.25e-28	8.4e-27	53.5984
MAD2L1	1.92143	2.33362	11.8794	2.62e-28	9.79e-27	53.4441
BCKDHB	-1.78525	4.59039	-11.8678	2.91e-28	1.08e-26	53.3411
PRKAR2B	-2.63714	-0.112295	-11.8554	3.25e-28	1.21e-26	53.2309
MT1X	-4.28422	5.7712	-11.8492	3.44e-28	1.27e-26	53.1753
ZNF330	-1.064	4.28866	-11.847	3.51e-28	1.3e-26	53.1557
PPOX	1.08089	3.93302	11.8366	3.85e-28	1.42e-26	53.0634
ALDH2	-1.99647	9.29094	-11.8289	4.13e-28	1.52e-26	52.995
NUSAP1	1.99167	3.76006	11.8177	4.56e-28	1.67e-26	52.8958
FANCD2	1.93788	2.2084	11.8176	4.57e-28	1.67e-26	52.8953
MCL1	-1.10161	8.17328	-11.8172	4.59e-28	1.67e-26	52.8913
TRIM45	1.92036	1.27073	11.8167	4.6e-28	1.67e-26	52.8872
SLC38A2	-1.70741	7.47218	-11.814	4.72e-28	1.71e-26	52.8629
N4BP2L1	-1.62329	4.32626	-11.8097	4.9e-28	1.77e-26	52.8248
RNF152	-1.91228	4.67679	-11.805	5.12e-28	1.85e-26	52.7829
LILRB5	-2.21575	2.15582	-11.7956	5.56e-28	2e-26	52.7001
C1orf35	1.21657	3.92282	11.7956	5.56e-28	2e-26	52.6999
ID2	-1.62384	6.98931	-11.7948	5.6e-28	2.01e-26	52.6926
DHX34	1.07955	4.25725	11.7768	6.58e-28	2.35e-26	52.5335
CCL14	-2.22785	1.16667	-11.7716	6.89e-28	2.46e-26	52.4875
FAHD2A	-1.24988	4.80139	-11.7637	7.4e-28	2.63e-26	52.4172
ZFP36L1	-1.1567	7.62189	-11.7596	7.68e-28	2.72e-26	52.381
ECT2	2.10806	2.88471	11.7482	8.5e-28	3e-26	52.28
FANCG	1.33944	2.91717	11.7458	8.68e-28	3.06e-26	52.259
RTL10	1.0676	3.51725	11.7265	1.03e-27	3.62e-26	52.088
TK1	2.08337	4.36757	11.717	1.12e-27	3.93e-26	52.0044
CAMK4	-1.97942	-0.0633304	-11.7101	1.2e-27	4.17e-26	51.9429
ACAA1	-1.76868	7.35433	-11.707	1.23e-27	4.28e-26	51.9155
TTC36	-5.01319	1.93208	-11.7043	1.26e-27	4.37e-26	51.8923
TRIM11	1.06067	4.10035	11.7016	1.29e-27	4.46e-26	51.8679
ABCC5	1.10236	3.65046	11.7014	1.29e-27	4.46e-26	51.8661
TPPP2	-2.88923	-0.216739	-11.6926	1.4e-27	4.81e-26	51.7884
PCLAF	2.12557	2.38742	11.6903	1.43e-27	4.9e-26	51.7685
GNA14	-2.24626	0.607448	-11.6886	1.45e-27	4.96e-26	51.7536
CUL7	1.10098	4.94705	11.6805	1.56e-27	5.32e-26	51.6819
SLC35D1	-1.51603	5.9512	-11.6686	1.73e-27	5.9e-26	51.577
PLK4	1.83469	0.794752	11.6671	1.75e-27	5.97e-26	51.5635
CAD	1.18806	4.67012	11.6452	2.13e-27	7.24e-26	51.3704
TACC3	1.83809	4.12801	11.633	2.37e-27	8.04e-26	51.2636
ZNF219	1.25752	4.42663	11.6321	2.39e-27	8.09e-26	51.2551
SOCS2	-2.58392	3.50389	-11.6308	2.42e-27	8.16e-26	51.2441
TFPI2	-2.76903	0.191683	-11.63	2.44e-27	8.2e-26	51.2372
FBXL18	1.24127	1.40078	11.6128	2.84e-27	9.54e-26	51.0852
MAP2K3	-1.22527	5.67769	-11.61	2.91e-27	9.75e-26	51.0608
CHTF18	1.52026	2.87003	11.5896	3.49e-27	1.17e-25	50.8821
MYOM2	-2.83678	-0.0330598	-11.5858	3.61e-27	1.2e-25	50.8479
ZNF251	1.15904	3.32133	11.5575	4.64e-27	1.54e-25	50.6001
MS4A6A	-2.09156	3.95673	-11.5562	4.69e-27	1.56e-25	50.5888
WDHD1	1.74846	1.47173	11.5478	5.06e-27	1.67e-25	50.5152
RANBP3L	-3.30467	-0.436328	-11.5432	5.27e-27	1.74e-25	50.4744
PANK1	-1.74554	5.26388	-11.5372	5.56e-27	1.83e-25	50.4218
KIF11	1.8947	2.33843	11.5342	5.7e-27	1.87e-25	50.3956
TSLP	-3.39923	-0.0414534	-11.5336	5.74e-27	1.88e-25	50.3903
CD302	-1.89974	4.37788	-11.5308	5.88e-27	1.92e-25	50.3656
PDE7B	-2.05789	1.03061	-11.5192	6.52e-27	2.12e-25	50.2639
CDC7	1.84944	1.4308	11.5059	7.33e-27	2.38e-25	50.1474
MMAA	-1.3234	3.94999	-11.4921	8.28e-27	2.69e-25	50.0273
STC2	2.59919	2.16767	11.485	8.81e-27	2.85e-25	49.9651
HELLS	2.13911	2.07841	11.4734	9.77e-27	3.16e-25	49.8632
PCDH9	-2.99168	-0.490647	-11.4698	1.01e-26	3.25e-25	49.8319
NOL12	1.08815	1.62384	11.4559	1.14e-26	3.66e-25	49.711
RUSC1	1.2532	4.04622	11.4519	1.18e-26	3.79e-25	49.6756
SOCS6	-1.07258	4.64376	-11.4268	1.47e-26	4.71e-25	49.4563
DNAJC25	-1.39707	4.10688	-11.4264	1.48e-26	4.71e-25	49.4536
NAT9	1.1298	4.43919	11.4257	1.49e-26	4.73e-25	49.447
SPSB2	1.40586	2.86629	11.4226	1.53e-26	4.84e-25	49.4197
PRAM1	-1.82212	-0.121419	-11.4203	1.56e-26	4.92e-25	49.4004
NCOR1	-1.22025	5.60165	-11.4189	1.58e-26	4.97e-25	49.3877
FAM13A	-2.46986	3.62517	-11.4153	1.63e-26	5.12e-25	49.3563
MUT	-1.53634	6.56302	-11.4084	1.73e-26	5.43e-25	49.2963
RBMS3	-1.86203	1.50158	-11.4073	1.75e-26	5.47e-25	49.2867
CAP2	1.987	4.18789	11.406	1.77e-26	5.52e-25	49.2753
RNF125	-2.32881	2.87703	-11.4016	1.84e-26	5.73e-25	49.2369
CRYBG2	2.53406	0.711686	11.3643	2.55e-26	7.93e-25	48.9126
TCTEX1D1	-2.77584	-0.938876	-11.3639	2.56e-26	7.93e-25	48.9089
RAD51	1.96938	0.988672	11.3496	2.9e-26	8.96e-25	48.785
CCT3	1.06947	8.12363	11.3488	2.92e-26	9.01e-25	48.778
DDX39A	1.30599	5.36343	11.3369	3.25e-26	9.96e-25	48.6739
SCARA5	-3.52873	-1.36043	-11.3299	3.45e-26	1.05e-24	48.6136
ACSM3	-2.73905	4.05248	-11.329	3.48e-26	1.06e-24	48.6059
LARP1B	-1.19537	4.54553	-11.3233	3.66e-26	1.11e-24	48.5561
LOXL2	1.51821	3.36113	11.32	3.77e-26	1.14e-24	48.5276
SPRYD4	-1.49744	5.60536	-11.3164	3.89e-26	1.18e-24	48.4963
AJM1	1.60078	1.80635	11.3151	3.93e-26	1.19e-24	48.4854
TIGD5	1.4125	3.30432	11.3058	4.26e-26	1.29e-24	48.4045
POLA2	1.21894	3.42035	11.303	4.37e-26	1.31e-24	48.3805
RFX5	1.15939	4.73033	11.2892	4.93e-26	1.48e-24	48.261
CDH19	-3.5598	-0.958191	-11.2892	4.93e-26	1.48e-24	48.2602
MTHFD2L	-1.40186	2.70326	-11.2799	5.35e-26	1.6e-24	48.1798
PIF1	2.23262	0.624743	11.2787	5.41e-26	1.61e-24	48.1699
FAM83F	-3.52735	-1.31955	-11.2754	5.57e-26	1.65e-24	48.1407
PDLIM5	-1.18376	6.16974	-11.2637	6.16e-26	1.82e-24	48.0401
GNE	-1.83887	5.95054	-11.2605	6.34e-26	1.87e-24	48.0119
NGFR	-3.14669	2.43916	-11.2569	6.54e-26	1.92e-24	47.9807
MESP2	2.359	-0.582407	11.2546	6.68e-26	1.96e-24	47.961
EGR3	-2.33506	-0.228929	-11.2433	7.37e-26	2.15e-24	47.8635
MYO19	1.11426	4.4793	11.2376	7.75e-26	2.25e-24	47.8137
TMEM201	1.18615	3.01439	11.2314	8.17e-26	2.37e-24	47.7607
TAPT1	-1.11938	4.8619	-11.2294	8.32e-26	2.4e-24	47.743
DHODH	-2.01297	5.32015	-11.2221	8.87e-26	2.56e-24	47.68
FCGR2B	-3.19516	1.08867	-11.2131	9.59e-26	2.75e-24	47.6028
IVD	-1.37829	7.13358	-11.2055	1.02e-25	2.94e-24	47.5371
MCM3	1.37093	5.65926	11.1943	1.13e-25	3.23e-24	47.4401
PIGU	1.05174	4.45139	11.1709	1.39e-25	3.95e-24	47.2386
TCF21	-2.24952	-0.607069	-11.1708	1.39e-25	3.95e-24	47.2374
SCNM1	1.23767	4.30369	11.169	1.41e-25	4e-24	47.2218
PLPBP	-1.22384	5.27732	-11.1551	1.59e-25	4.51e-24	47.1028
HBB	-2.80861	3.10312	-11.151	1.65e-25	4.66e-24	47.0667
MMP11	2.94007	2.64817	11.142	1.78e-25	5e-24	46.9895
MSRA	-1.61306	4.53475	-11.1353	1.89e-25	5.27e-24	46.9319
ASPA	-2.5586	0.986904	-11.1333	1.92e-25	5.35e-24	46.9151
RAD51AP1	2.01825	1.21675	11.1327	1.93e-25	5.37e-24	46.9096
ANTXR2	-1.46046	4.62302	-11.1254	2.06e-25	5.71e-24	46.8473
ZC2HC1C	-1.36506	1.7135	-11.1211	2.14e-25	5.91e-24	46.8102
DSN1	1.16255	3.73662	11.1193	2.17e-25	5.99e-24	46.7947
RET	-3.27972	-0.854283	-11.104	2.48e-25	6.82e-24	46.6631
MAPT	2.42652	1.83638	11.0995	2.58e-25	7.08e-24	46.6244
RHNO1	1.09373	3.21179	11.0984	2.6e-25	7.13e-24	46.6149
IRF8	-1.88724	3.6056	-11.0905	2.79e-25	7.59e-24	46.5475
GBA	1.22363	5.92995	11.0628	3.54e-25	9.58e-24	46.3099
ACADSB	-2.08622	7.41741	-11.0618	3.57e-25	9.63e-24	46.3008
WDR76	1.90803	1.95159	11.0576	3.7e-25	9.96e-24	46.2654
CCHCR1	1.28423	4.55367	11.0489	3.99e-25	1.07e-23	46.1909
GADD45B	-2.17344	6.50959	-11.044	4.17e-25	1.11e-23	46.1482
APOF	-4.371	4.8395	-11.0339	4.55e-25	1.21e-23	46.0622
TIGD1	1.53861	1.07292	11.0276	4.8e-25	1.27e-23	46.0086
CYP39A1	-4.07176	2.59063	-11.0264	4.86e-25	1.29e-23	45.9977
FERMT2	-1.16601	5.56659	-11.0252	4.91e-25	1.3e-23	45.9874
SYNE1	-1.47156	4.25663	-11.0147	5.37e-25	1.41e-23	45.8978
MLYCD	-1.45883	4.5413	-11.0123	5.49e-25	1.44e-23	45.8772
EFNA4	1.40724	2.85933	11.0096	5.61e-25	1.47e-23	45.8547
LY6E	-3.22032	6.02853	-11.0024	5.97e-25	1.56e-23	45.7926
P3H2	-2.00535	1.30814	-10.992	6.54e-25	1.71e-23	45.7038
ATF3	-1.88671	4.85182	-10.9831	7.05e-25	1.84e-23	45.6284
NSMCE2	1.25907	4.07313	10.9437	9.91e-25	2.58e-23	45.2922
TLR4	-1.70874	2.53511	-10.9428	9.98e-25	2.59e-23	45.2848
NR4A1	-2.47858	3.94543	-10.9242	1.17e-24	3.02e-23	45.1259
POLD1	1.16542	4.02799	10.9058	1.37e-24	3.53e-23	44.9698
ERFE	2.00116	-0.350941	10.8905	1.57e-24	4.02e-23	44.8395
CCNE1	2.56002	1.0908	10.8849	1.64e-24	4.21e-23	44.7916
NECAB3	1.30333	5.01128	10.8833	1.67e-24	4.26e-23	44.7785
GLI4	1.37957	3.43629	10.8773	1.75e-24	4.48e-23	44.7277
CD1D	-2.36559	1.91894	-10.8764	1.77e-24	4.51e-23	44.7199
STX1A	1.34901	0.683857	10.8733	1.81e-24	4.62e-23	44.6936
DSE	-1.77731	2.3694	-10.8565	2.1e-24	5.32e-23	44.5513
CPED1	-2.75443	2.99642	-10.8537	2.15e-24	5.45e-23	44.5273
NAT1	-1.43644	2.00702	-10.8481	2.25e-24	5.7e-23	44.4799
KIAA1522	1.40518	5.72364	10.8471	2.27e-24	5.74e-23	44.4715
DBT	-1.19834	4.90841	-10.8459	2.29e-24	5.79e-23	44.4615
MAST2	1.00006	4.54854	10.8354	2.51e-24	6.31e-23	44.3722
GPRIN1	2.29003	1.10321	10.8335	2.55e-24	6.41e-23	44.3559
ASS1	-2.21723	9.1781	-10.833	2.56e-24	6.42e-23	44.3517
ACAT1	-1.61669	7.91542	-10.8311	2.61e-24	6.52e-23	44.3352
GPC3	4.81593	6.89862	10.82	2.87e-24	7.15e-23	44.2419
UBE2S	1.6742	3.33748	10.8193	2.88e-24	7.17e-23	44.2355
SCIMP	-1.86326	0.845646	-10.8161	2.96e-24	7.36e-23	44.2083
ACAD11	-2.09737	0.497987	-10.8132	3.04e-24	7.53e-23	44.1841
TSSK6	1.26665	0.601355	10.8112	3.09e-24	7.65e-23	44.1668
NELFE	1.22965	5.75943	10.8058	3.24e-24	7.99e-23	44.1218
CLSPN	2.34003	-0.126823	10.8026	3.33e-24	8.18e-23	44.0945
SERTAD1	-1.46791	3.72022	-10.8023	3.33e-24	8.19e-23	44.0922
CMTM6	-1.12051	6.16442	-10.7996	3.41e-24	8.37e-23	44.0688
ALDH6A1	-2.24131	7.25289	-10.7988	3.43e-24	8.4e-23	44.0626
SMG9	1.0399	4.0915	10.7941	3.58e-24	8.71e-23	44.0227
PRR11	2.08498	1.73167	10.7897	3.71e-24	9e-23	43.9858
CYP4V2	-1.7184	6.1698	-10.7857	3.84e-24	9.3e-23	43.9517
CYB561D1	1.31953	2.01426	10.7848	3.87e-24	9.36e-23	43.9442
ACLY	1.00664	6.2624	10.7821	3.96e-24	9.56e-23	43.9216
PXDC1	-1.37021	6.48492	-10.7797	4.05e-24	9.75e-23	43.9007
ZBTB21	-1.31716	3.4624	-10.7737	4.26e-24	1.02e-22	43.8502
CYP2B6	-3.87755	5.55109	-10.7655	4.56e-24	1.09e-22	43.7815
MT-ATP6	-1.49845	12.0553	-10.764	4.62e-24	1.11e-22	43.7684
TP73	2.68617	0.42816	10.7609	4.75e-24	1.13e-22	43.7425
FOXK1	1.13754	3.98058	10.7548	5e-24	1.19e-22	43.6905
YEATS2	1.00234	3.6656	10.7489	5.26e-24	1.25e-22	43.6407
KPNA2	1.36164	5.38606	10.7298	6.19e-24	1.47e-22	43.4805
OSBPL3	1.67513	2.47786	10.7281	6.28e-24	1.49e-22	43.4657
CHAF1B	2.10077	1.77366	10.7185	6.81e-24	1.61e-22	43.3853
JUN	-1.6126	6.85773	-10.7129	7.15e-24	1.68e-22	43.3376
CTBS	-1.15359	4.43068	-10.7109	7.27e-24	1.71e-22	43.3213
DNAH14	1.15696	2.37715	10.6876	8.87e-24	2.08e-22	43.1247
HPS5	-1.53067	4.60757	-10.686	8.99e-24	2.11e-22	43.1111
VMO1	-1.54479	1.24237	-10.6816	9.33e-24	2.18e-22	43.0745
BDH2	-1.54609	4.26313	-10.6779	9.63e-24	2.25e-22	43.0431
SUCO	1.04342	4.83961	10.6668	1.06e-23	2.46e-22	42.9502
NR4A3	-2.57079	1.03209	-10.6657	1.07e-23	2.48e-22	42.9413
PGM1	-1.39955	7.18501	-10.6657	1.07e-23	2.48e-22	42.9408
PNRC1	-1.22999	6.35948	-10.6644	1.08e-23	2.5e-22	42.9302
ARHGAP33	1.42607	2.05565	10.6607	1.11e-23	2.58e-22	42.8994
MUC6	-4.66231	-0.471575	-10.6579	1.14e-23	2.63e-22	42.8758
KLF10	-1.56894	5.34977	-10.6546	1.17e-23	2.71e-22	42.8477
JUNB	-1.71639	6.29885	-10.6442	1.28e-23	2.94e-22	42.761
SLC25A47	-5.18636	4.67499	-10.6301	1.44e-23	3.31e-22	42.6422
ZNF696	1.09138	2.58089	10.6256	1.5e-23	3.43e-22	42.6052
SCRIB	1.19789	6.20151	10.6197	1.58e-23	3.61e-22	42.5553
CD244	-1.99477	-0.44159	-10.6113	1.69e-23	3.86e-22	42.4848
IQCE	1.08355	3.52643	10.6078	1.74e-23	3.97e-22	42.456
NCAM1	-2.95191	-0.203767	-10.6036	1.81e-23	4.1e-22	42.421
ID1	-2.26863	4.04151	-10.6029	1.82e-23	4.12e-22	42.4143
NUDT1	1.53086	2.78447	10.5995	1.87e-23	4.24e-22	42.3866
LIN9	1.37911	1.57727	10.593	1.98e-23	4.46e-22	42.3318
EBF1	1.7702	1.14543	10.5929	1.98e-23	4.46e-22	42.3311
MAP3K9	1.21283	2.20458	10.5864	2.09e-23	4.7e-22	42.2767
CD163	-2.17611	4.26482	-10.5784	2.24e-23	5.02e-22	42.2096
DLC1	-1.42185	4.75593	-10.5684	2.43e-23	5.46e-22	42.126
HOXA13	4.33484	0.283762	10.5644	2.52e-23	5.63e-22	42.0933
IRAK1	1.20231	6.47462	10.5608	2.6e-23	5.8e-22	42.0626
PLIN2	-1.91083	7.91881	-10.556	2.7e-23	6.02e-22	42.0229
HAND2	-3.44531	-0.445167	-10.5525	2.78e-23	6.19e-22	41.9934
OLFML3	-2.37874	2.53408	-10.5519	2.8e-23	6.2e-22	41.9888
NFIL3	-1.46406	5.22773	-10.5519	2.8e-23	6.2e-22	41.9887
CCDC25	-1.11668	4.78371	-10.5428	3.02e-23	6.68e-22	41.9125
CAT	-1.64321	8.18682	-10.5425	3.03e-23	6.68e-22	41.9102
HMGCL	-1.50979	7.01575	-10.5422	3.03e-23	6.69e-22	41.908
RHOB	-1.72924	8.66335	-10.5275	3.44e-23	7.52e-22	41.7851
NUDT17	1.48179	0.384196	10.5249	3.51e-23	7.68e-22	41.7632
IER2	-1.29576	5.78746	-10.5233	3.56e-23	7.77e-22	41.7499
DUSP1	-2.01363	7.32813	-10.5188	3.7e-23	8.04e-22	41.7129
BLM	2.06597	0.912189	10.5171	3.75e-23	8.15e-22	41.6986
RNF165	-2.46746	-0.220483	-10.5136	3.86e-23	8.38e-22	41.6692
DCN	-4.06168	4.64803	-10.5069	4.09e-23	8.85e-22	41.6133
TRAF2	1.07936	4.41167	10.5062	4.11e-23	8.89e-22	41.608
LAMA4	1.35984	4.15043	10.5051	4.15e-23	8.96e-22	41.5986
CPT2	-1.39787	5.68442	-10.5008	4.3e-23	9.28e-22	41.5627
CD200	1.73961	1.03794	10.4893	4.74e-23	1.02e-21	41.4676
TMEM106C	1.33126	5.5657	10.4867	4.84e-23	1.04e-21	41.4457
SLC9B2	-1.74867	4.28064	-10.4863	4.86e-23	1.04e-21	41.4422
MAN1C1	-2.3473	3.57564	-10.4738	5.4e-23	1.15e-21	41.3381
ZNF605	1.08916	2.90605	10.4679	5.67e-23	1.21e-21	41.2895
EPM2A	-1.14377	2.1744	-10.4567	6.23e-23	1.32e-21	41.1967
CBR4	-1.36356	4.65079	-10.4556	6.29e-23	1.33e-21	41.1872
GNPNAT1	-1.19434	5.14605	-10.4533	6.41e-23	1.35e-21	41.1685
CCDC34	1.48617	2.95183	10.4529	6.44e-23	1.36e-21	41.1651
DTYMK	1.1914	4.31357	10.4525	6.46e-23	1.36e-21	41.1613
SLC6A19	-3.83645	-1.85966	-10.4518	6.5e-23	1.37e-21	41.1558
NAA40	1.01419	3.19539	10.4516	6.51e-23	1.37e-21	41.1539
RCL1	-1.7394	4.65898	-10.4505	6.57e-23	1.38e-21	41.1449
CBX2	2.10156	1.39711	10.4457	6.84e-23	1.43e-21	41.105
SLC31A1	-1.15105	6.56115	-10.4448	6.89e-23	1.44e-21	41.0982
EDNRB	-1.75574	4.05938	-10.4429	7e-23	1.46e-21	41.0822
FEZ1	-1.75105	1.67952	-10.4267	8.02e-23	1.67e-21	40.9474
GNAO1	-3.56101	1.82098	-10.4233	8.25e-23	1.71e-21	40.9197
ZKSCAN3	1.27653	2.48486	10.4218	8.35e-23	1.73e-21	40.9071
PELI2	-2.10746	0.322238	-10.4216	8.37e-23	1.73e-21	40.9056
DPF3	-2.28002	0.193512	-10.4166	8.72e-23	1.8e-21	40.8644
IL33	-2.30571	2.49454	-10.4126	9.02e-23	1.86e-21	40.8307
IL3RA	1.22976	2.33828	10.4063	9.51e-23	1.96e-21	40.7785
ZNF775	1.48924	3.61735	10.4062	9.52e-23	1.96e-21	40.7777
OTX1	2.69745	-0.896762	10.406	9.54e-23	1.96e-21	40.7763
ACYP1	1.04503	1.09371	10.4015	9.9e-23	2.03e-21	40.7388
P2RY13	-2.01938	0.424716	-10.3972	1.03e-22	2.1e-21	40.7039
LPA	-3.3119	3.77983	-10.3972	1.03e-22	2.1e-21	40.7034
KNTC1	1.66484	2.95304	10.3956	1.04e-22	2.12e-21	40.6903
ACSL1	-2.31873	8.53916	-10.3917	1.08e-22	2.19e-21	40.6577
OIP5	1.81948	0.399986	10.3873	1.11e-22	2.26e-21	40.6221
PALM2	-2.06478	-0.349697	-10.3869	1.12e-22	2.27e-21	40.6187
STEAP3	-2.23735	6.28803	-10.379	1.19e-22	2.41e-21	40.5535
RMDN2	-1.30478	3.06505	-10.3552	1.46e-22	2.94e-21	40.3568
CYP2C8	-4.12606	6.97249	-10.354	1.47e-22	2.96e-21	40.3464
DPT	-3.91599	0.676786	-10.3505	1.52e-22	3.04e-21	40.3177
FBP1	-2.89173	7.26433	-10.3499	1.52e-22	3.05e-21	40.3133
FOXS1	2.23477	0.239211	10.3491	1.53e-22	3.07e-21	40.3066
JDP2	-1.37085	3.1282	-10.3234	1.9e-22	3.77e-21	40.0948
HSF4	1.63974	2.70023	10.3171	2e-22	3.97e-21	40.0426
ADK	-1.25763	5.38176	-10.3047	2.22e-22	4.39e-21	39.941
GCH1	-1.91655	4.83815	-10.2871	2.57e-22	5.06e-21	39.796
GRAMD1C	-2.0736	2.80175	-10.2786	2.76e-22	5.42e-21	39.7263
C8orf33	1.11881	5.36594	10.276	2.82e-22	5.53e-21	39.7044
KIF24	1.56587	0.610393	10.2752	2.84e-22	5.56e-21	39.6981
C1QTNF1	-2.68352	3.81891	-10.2733	2.88e-22	5.64e-21	39.6823
VSIG4	-2.31251	2.39757	-10.2683	3.01e-22	5.87e-21	39.6418
PBLD	-2.21945	6.06476	-10.2537	3.39e-22	6.59e-21	39.5216
RETREG1	-3.72967	2.55487	-10.2523	3.43e-22	6.66e-21	39.5099
SLC7A2	-2.38619	6.83643	-10.2518	3.45e-22	6.67e-21	39.5064
MCM7	1.25716	5.92352	10.2441	3.68e-22	7.1e-21	39.4428
MCC	-2.31138	3.23706	-10.2364	3.92e-22	7.56e-21	39.3796
MMRN1	-2.22413	0.958215	-10.2346	3.98e-22	7.65e-21	39.365
IL6ST	-1.05017	7.51	-10.231	4.1e-22	7.85e-21	39.3352
MFSD2A	-4.39587	3.47807	-10.2182	4.55e-22	8.71e-21	39.231
PLPPR2	1.12978	4.45758	10.2148	4.68e-22	8.94e-21	39.203
CFTR	-4.29093	-0.694037	-10.2132	4.75e-22	9.04e-21	39.19
CBX8	1.12919	3.12524	10.213	4.76e-22	9.05e-21	39.188
ETFRF1	-1.14839	4.46711	-10.207	5e-22	9.47e-21	39.1392
AQP3	-1.90269	5.44822	-10.2032	5.16e-22	9.75e-21	39.1083
HBA2	-2.60451	1.79089	-10.202	5.21e-22	9.84e-21	39.098
ATAD5	1.47038	1.08994	10.1952	5.51e-22	1.04e-20	39.0423
EPS8L3	4.19533	1.86442	10.1933	5.6e-22	1.05e-20	39.0272
USP38	-1.03603	4.46758	-10.1809	6.2e-22	1.16e-20	38.9259
RASGRF2	1.54415	2.03568	10.1618	7.26e-22	1.36e-20	38.77
SLC7A8	-1.88568	2.14093	-10.1516	7.9e-22	1.47e-20	38.6867
PPP1R3B	-1.91809	5.90467	-10.1432	8.46e-22	1.58e-20	38.6186
LPL	2.02007	1.08189	10.1419	8.56e-22	1.59e-20	38.6074
SLC7A6	1.66279	1.32583	10.1381	8.83e-22	1.64e-20	38.5766
OTUB2	1.44986	0.823076	10.1312	9.35e-22	1.73e-20	38.5204
SIGLEC9	-1.66667	0.394222	-10.1287	9.54e-22	1.76e-20	38.5003
GINS2	1.719	2.4055	10.1282	9.58e-22	1.77e-20	38.496
NSUN6	-1.20545	4.29487	-10.1247	9.86e-22	1.82e-20	38.468
EPHX2	-1.95356	6.46716	-10.121	1.02e-21	1.87e-20	38.4372
GOLGA8B	1.65824	3.6621	10.1208	1.02e-21	1.87e-20	38.4356
IDO2	-3.23649	-0.996873	-10.1183	1.04e-21	1.91e-20	38.4159
CHEK1	1.43682	2.44145	10.117	1.05e-21	1.92e-20	38.4051
STEAP4	-2.8403	2.92013	-10.1149	1.07e-21	1.96e-20	38.3882
NCAPD2	1.2802	4.37632	10.1134	1.08e-21	1.97e-20	38.3758
CLDN10	-3.82372	-1.27773	-10.1112	1.1e-21	2.01e-20	38.3578
SCP2	-1.70137	8.2634	-10.1016	1.19e-21	2.17e-20	38.2795
MCM5	1.29771	5.39327	10.0939	1.27e-21	2.3e-20	38.2174
LIG1	1.05162	4.54494	10.0873	1.34e-21	2.42e-20	38.1636
ZBED8	1.18582	1.19848	10.0838	1.38e-21	2.48e-20	38.1351
MCM4	1.41158	5.00847	10.0814	1.41e-21	2.53e-20	38.1159
MSH5	1.86192	0.395997	10.0804	1.42e-21	2.55e-20	38.1076
PDE2A	-1.84856	2.71094	-10.0764	1.47e-21	2.63e-20	38.0752
NOCT	-1.97158	1.99187	-10.0704	1.54e-21	2.76e-20	38.0264
CR1	-2.36718	-0.858322	-10.0694	1.55e-21	2.78e-20	38.0186
NPEPL1	1.09798	2.93171	10.0554	1.74e-21	3.11e-20	37.9048
COA6	1.12719	4.67508	10.0512	1.8e-21	3.22e-20	37.8707
SLC8A1	-1.60587	1.23415	-10.0294	2.16e-21	3.84e-20	37.694
KDM6B	-1.02855	4.37495	-10.0233	2.27e-21	4.02e-20	37.6445
PNPLA7	-1.70112	3.05629	-10.0176	2.38e-21	4.2e-20	37.5988
CDCA4	1.20228	2.25595	10.0165	2.4e-21	4.23e-20	37.5895
ENO3	-2.45339	3.92674	-10.0162	2.4e-21	4.24e-20	37.5872
LDLR	-1.45055	6.29856	-10.0084	2.56e-21	4.51e-20	37.5241
SNRPE	1.06039	5.44918	10.0039	2.66e-21	4.67e-20	37.4879
FBF1	1.25628	1.12516	10.0024	2.69e-21	4.72e-20	37.4761
FPR1	-2.394	0.445798	-10.0003	2.74e-21	4.79e-20	37.4589
CKS1B	1.08932	4.23456	9.99981	2.75e-21	4.8e-20	37.4549
HAO2	-4.53185	3.78586	-9.99733	2.8e-21	4.89e-20	37.4349
C11orf54	-1.34431	6.24427	-9.99347	2.89e-21	5.04e-20	37.4037
MYO1B	-1.35206	7.59252	-9.97624	3.33e-21	5.79e-20	37.2647
PKN3	1.37607	2.85427	9.96801	3.56e-21	6.18e-20	37.1983
KLF11	-1.34134	4.65449	-9.96244	3.73e-21	6.46e-20	37.1534
KIFC2	1.65829	2.97067	9.96119	3.77e-21	6.52e-20	37.1434
ACADM	-1.55121	6.35855	-9.95554	3.95e-21	6.81e-20	37.0978
ITGA6	1.30524	5.5036	9.95199	4.06e-21	7e-20	37.0692
AVPR1A	-4.32435	2.10788	-9.94013	4.47e-21	7.69e-20	36.9738
GLS2	-4.00147	1.01736	-9.93619	4.62e-21	7.93e-20	36.9421
HSD17B13	-5.47902	4.29466	-9.92859	4.91e-21	8.43e-20	36.881
KLC2	1.05645	3.46318	9.92806	4.94e-21	8.45e-20	36.8767
COL4A1	1.59896	7.07952	9.91326	5.57e-21	9.51e-20	36.7577
NOTCH3	1.7855	4.74522	9.897	6.35e-21	1.08e-19	36.6271
SOCS3	-2.30757	4.42616	-9.89329	6.55e-21	1.11e-19	36.5974
BCAN	2.96334	-0.103664	9.88114	7.23e-21	1.22e-19	36.4999
ACVR1C	-2.04551	0.11192	-9.87818	7.4e-21	1.25e-19	36.4762
SLC22A1	-4.70418	5.67832	-9.87751	7.44e-21	1.26e-19	36.4708
OXT	-3.23646	-1.79884	-9.87627	7.52e-21	1.27e-19	36.4609
SSR2	1.06536	7.7151	9.87549	7.57e-21	1.27e-19	36.4546
SLC38A6	1.05636	2.77181	9.8748	7.61e-21	1.28e-19	36.4491
PLGLB2	-2.64596	0.934389	-9.86925	7.96e-21	1.33e-19	36.4046
FAM198A	-3.17736	0.542039	-9.86752	8.07e-21	1.35e-19	36.3908
SUCLG2	-1.20705	6.82926	-9.86694	8.11e-21	1.36e-19	36.3861
ALKBH6	1.11712	1.13328	9.86535	8.22e-21	1.37e-19	36.3734
CASTOR3	1.40985	2.30567	9.86428	8.29e-21	1.38e-19	36.3648
PEMT	-1.67256	5.50335	-9.86027	8.56e-21	1.43e-19	36.3327
SRD5A1	-1.70178	5.16747	-9.84747	9.5e-21	1.57e-19	36.2303
FANCE	1.40406	1.39687	9.84564	9.64e-21	1.59e-19	36.2156
SH3PXD2B	1.1356	3.32067	9.83534	1.05e-20	1.73e-19	36.1332
DEPDC1B	2.46834	1.19712	9.82895	1.1e-20	1.82e-19	36.0821
TENM3	-2.61705	-2.30601	-9.82723	1.12e-20	1.84e-19	36.0684
ECHS1	-1.36844	8.832	-9.82556	1.13e-20	1.86e-19	36.0551
GINS3	1.25477	1.39494	9.8246	1.14e-20	1.87e-19	36.0474
ZCCHC24	-1.14139	5.0457	-9.82325	1.16e-20	1.89e-19	36.0366
C4orf46	1.07294	1.48831	9.81709	1.21e-20	1.98e-19	35.9874
CENPP	1.0041	1.18358	9.81479	1.24e-20	2.02e-19	35.969
KRTCAP2	1.04829	4.62166	9.81439	1.24e-20	2.02e-19	35.9659
CNTN4	-2.01167	0.0367913	-9.81426	1.24e-20	2.02e-19	35.9648
C8orf44	1.10066	0.801231	9.81237	1.26e-20	2.05e-19	35.9497
TRPV6	-3.16675	-1.67705	-9.80279	1.36e-20	2.21e-19	35.8733
UGP2	-1.36644	7.83894	-9.78907	1.52e-20	2.47e-19	35.7639
SNRPB	1.04284	6.78661	9.78808	1.54e-20	2.48e-19	35.756
PABPC1L	1.64469	3.80904	9.78436	1.58e-20	2.55e-19	35.7263
KCNJ16	-3.32684	-1.82242	-9.7833	1.6e-20	2.57e-19	35.7179
GPSM2	1.33122	1.81456	9.77565	1.7e-20	2.73e-19	35.6569
GPHN	-1.45497	4.44692	-9.77242	1.74e-20	2.79e-19	35.6312
ADAM15	1.15376	5.96285	9.77209	1.75e-20	2.8e-19	35.6286
ARHGEF11	1.05036	5.37465	9.76548	1.84e-20	2.94e-19	35.576
ALDH1B1	-1.60082	6.67104	-9.74823	2.12e-20	3.38e-19	35.4388
PSRC1	1.66756	1.69991	9.74406	2.19e-20	3.49e-19	35.4056
SPART	-1.93886	2.39377	-9.7399	2.26e-20	3.6e-19	35.3726
KMO	-2.76681	3.60566	-9.73617	2.33e-20	3.7e-19	35.3429
LTK	-2.20932	-0.392242	-9.73063	2.44e-20	3.87e-19	35.2989
SKAP1	-2.30693	2.32218	-9.72622	2.53e-20	3.99e-19	35.2639
GCDH	-1.55486	5.74538	-9.72596	2.53e-20	4e-19	35.2618
KLF6	-1.4108	6.68304	-9.7256	2.54e-20	4e-19	35.259
KLKB1	-2.17237	5.98381	-9.72087	2.64e-20	4.16e-19	35.2215
GPAA1	1.21413	7.39887	9.71212	2.83e-20	4.45e-19	35.152
MASP1	-2.04491	6.40027	-9.70876	2.91e-20	4.57e-19	35.1254
AK3	-1.11978	6.65844	-9.70785	2.93e-20	4.6e-19	35.1182
SGMS2	-1.49272	3.50974	-9.70462	3.01e-20	4.71e-19	35.0926
RDH5	-2.12304	2.38778	-9.68961	3.39e-20	5.29e-19	34.9736
SRD5A2	-3.71177	2.78339	-9.68815	3.43e-20	5.34e-19	34.9621
C17orf53	1.56266	1.00327	9.68645	3.48e-20	5.4e-19	34.9486
SEC24B	-1.13394	4.96385	-9.67856	3.7e-20	5.74e-19	34.8861
ZGRF1	1.22903	0.701621	9.67815	3.72e-20	5.76e-19	34.8829
TMEM220	-1.84623	4.92084	-9.67655	3.76e-20	5.82e-19	34.8703
SIX1	2.61222	-1.25943	9.67489	3.82e-20	5.9e-19	34.8571
TENT5A	-1.45462	4.37522	-9.67232	3.89e-20	6.01e-19	34.8368
SYTL5	-2.36474	0.0740611	-9.6647	4.14e-20	6.38e-19	34.7765
DUSP5	-1.94823	3.66666	-9.66402	4.16e-20	6.4e-19	34.7712
CLIC6	-3.08034	-1.02358	-9.65852	4.35e-20	6.68e-19	34.7276
DNAJC6	2.10927	1.2917	9.65673	4.41e-20	6.75e-19	34.7135
AXL	-1.56103	3.13646	-9.65489	4.48e-20	6.84e-19	34.699
EPB41L4B	-1.95156	5.26141	-9.64943	4.68e-20	7.13e-19	34.6559
TMC7	1.73329	0.477038	9.64902	4.69e-20	7.15e-19	34.6526
F8	-1.61027	3.36233	-9.64775	4.74e-20	7.22e-19	34.6426
STARD5	-1.80178	1.923	-9.64623	4.8e-20	7.3e-19	34.6305
PIGV	-1.06363	4.17859	-9.64384	4.89e-20	7.42e-19	34.6117
ALKAL2	-2.74069	-1.80392	-9.64376	4.9e-20	7.42e-19	34.6111
CFL2	-1.18729	5.89652	-9.64301	4.92e-20	7.45e-19	34.6051
C7	-4.12698	4.3385	-9.63652	5.19e-20	7.83e-19	34.5539
SAC3D1	1.167	3.57208	9.63418	5.28e-20	7.96e-19	34.5355
CFI	-1.68774	8.21633	-9.63405	5.29e-20	7.96e-19	34.5345
SERPINE1	-2.56683	6.27936	-9.63071	5.43e-20	8.15e-19	34.5081
IL18R1	-1.97353	1.59824	-9.63071	5.43e-20	8.15e-19	34.5081
C9	-5.61194	5.64501	-9.62198	5.83e-20	8.7e-19	34.4393
PYGB	1.20818	5.79291	9.62161	5.84e-20	8.72e-19	34.4364
ADAMTS1	-1.8162	4.16496	-9.61857	5.99e-20	8.92e-19	34.4124
PSMC3IP	1.34054	0.400601	9.615	6.16e-20	9.16e-19	34.3842
GRHL2	-2.85631	-1.92444	-9.61384	6.22e-20	9.23e-19	34.3751
PLCXD3	-2.94469	-0.583757	-9.60198	6.83e-20	1.01e-18	34.2817
SLCO1B3	-4.99552	1.57262	-9.59675	7.13e-20	1.05e-18	34.2405
CENPO	1.34552	2.1636	9.58431	7.87e-20	1.16e-18	34.1426
SELP	-2.39564	0.157856	-9.58125	8.06e-20	1.19e-18	34.1186
B3GNTL1	1.23276	2.08239	9.5799	8.15e-20	1.2e-18	34.108
DDIAS	1.39449	0.621643	9.57782	8.29e-20	1.22e-18	34.0916
MFAP3L	-2.92788	3.30892	-9.57119	8.73e-20	1.28e-18	34.0395
CAND2	-2.21107	-0.163439	-9.57026	8.8e-20	1.29e-18	34.0322
C3orf85	-3.19506	-0.63222	-9.56434	9.22e-20	1.35e-18	33.9857
NTN4	-1.64145	3.37984	-9.56395	9.25e-20	1.35e-18	33.9826
MCAM	1.30028	5.24518	9.55889	9.63e-20	1.4e-18	33.9429
ZC3H3	1.01324	4.78935	9.55616	9.84e-20	1.43e-18	33.9214
CIP2A	1.75299	0.934958	9.54785	1.05e-19	1.53e-18	33.8562
TANGO6	-1.0427	3.95083	-9.54627	1.07e-19	1.54e-18	33.8438
HOXD9	2.88611	-0.67397	9.54474	1.08e-19	1.56e-18	33.8319
NNMT	-3.77516	7.29123	-9.54332	1.09e-19	1.58e-18	33.8207
CEP152	1.24951	0.941739	9.54009	1.12e-19	1.62e-18	33.7954
SLC22A10	-3.22734	3.25879	-9.53689	1.15e-19	1.66e-18	33.7703
EDIL3	2.0567	1.49852	9.52351	1.28e-19	1.84e-18	33.6655
ENAH	1.36302	5.66591	9.52349	1.28e-19	1.84e-18	33.6653
CILP	-2.29778	-0.645364	-9.52265	1.28e-19	1.85e-18	33.6587
GRHPR	-1.47351	8.01786	-9.52027	1.31e-19	1.88e-18	33.6401
CENPJ	1.10933	1.9736	9.51743	1.34e-19	1.92e-18	33.6178
UROC1	-4.5266	3.4575	-9.51502	1.36e-19	1.95e-18	33.599
MT-ND4	-1.35733	13.4243	-9.50731	1.45e-19	2.07e-18	33.5386
IDNK	-1.39954	3.61386	-9.50521	1.48e-19	2.11e-18	33.5222
C1S	-1.68654	10.5806	-9.50387	1.49e-19	2.13e-18	33.5118
TACSTD2	-3.0842	0.388317	-9.50327	1.5e-19	2.14e-18	33.5071
ARL16	1.0514	4.00949	9.50133	1.52e-19	2.17e-18	33.4918
ZFPM2	-1.7407	0.338352	-9.49703	1.57e-19	2.24e-18	33.4583
BRSK1	1.62463	0.719193	9.48252	1.77e-19	2.51e-18	33.3448
SERPINB9	-1.49583	3.17244	-9.47895	1.82e-19	2.58e-18	33.317
TERT	3.60906	-0.737123	9.47866	1.82e-19	2.58e-18	33.3147
IL1B	-2.04134	-0.354339	-9.47424	1.89e-19	2.67e-18	33.2802
PROS1	-1.4503	7.23986	-9.47029	1.95e-19	2.75e-18	33.2494
NKIRAS1	-1.01467	3.23375	-9.46615	2.01e-19	2.84e-18	33.2171
RIPK4	-1.4303	4.21791	-9.46364	2.05e-19	2.89e-18	33.1975
NT5DC2	1.99514	3.63014	9.45875	2.13e-19	3.01e-18	33.1594
TMEM56	-1.7445	6.36748	-9.45724	2.16e-19	3.04e-18	33.1476
SMIM14	-1.28649	7.25735	-9.45712	2.16e-19	3.04e-18	33.1467
NR4A2	-2.11557	2.29973	-9.45705	2.16e-19	3.04e-18	33.1461
ZEB2	-1.45507	3.2392	-9.45577	2.18e-19	3.07e-18	33.1361
CD300E	-1.71341	-0.501104	-9.44844	2.31e-19	3.24e-18	33.079
ARHGAP10	-1.74822	2.11215	-9.44738	2.33e-19	3.27e-18	33.0707
MAN1A1	-1.3409	6.9769	-9.4446	2.38e-19	3.34e-18	33.0491
EME2	1.0976	2.45339	9.44313	2.41e-19	3.37e-18	33.0377
SLC16A4	-2.38804	0.985488	-9.44032	2.46e-19	3.45e-18	33.0158
TJP2	-1.08349	5.72139	-9.43526	2.57e-19	3.58e-18	32.9763
SLC41A2	-1.66638	5.24457	-9.43329	2.61e-19	3.63e-18	32.961
NIPAL1	-2.29721	2.15462	-9.42566	2.77e-19	3.85e-18	32.9016
TPX2	1.79562	4.06792	9.42459	2.79e-19	3.88e-18	32.8933
MTHFD1L	1.38733	3.03545	9.42205	2.85e-19	3.96e-18	32.8736
MROH1	1.14863	4.90156	9.41175	3.09e-19	4.28e-18	32.7935
UNC119B	1.21036	3.40175	9.40939	3.15e-19	4.36e-18	32.7752
RMI2	1.80468	1.95672	9.40623	3.22e-19	4.46e-18	32.7506
PTGIS	-3.03729	1.25517	-9.40513	3.25e-19	4.5e-18	32.7421
IL1RN	-2.21687	5.14933	-9.40151	3.35e-19	4.62e-18	32.7139
NR3C2	-1.71679	2.43415	-9.40035	3.38e-19	4.65e-18	32.7049
MAFG	1.18098	3.8976	9.39802	3.44e-19	4.73e-18	32.6868
MS4A7	-1.6796	3.37033	-9.39256	3.59e-19	4.93e-18	32.6444
NKX3-1	-1.98269	0.524387	-9.38792	3.72e-19	5.1e-18	32.6084
N4BP3	1.69034	0.275589	9.38332	3.86e-19	5.28e-18	32.5728
PAK5	-1.72783	-3.3405	-9.37778	4.03e-19	5.51e-18	32.5297
NXPH4	3.0389	-0.0120638	9.37311	4.18e-19	5.71e-18	32.4936
S100A8	-2.43881	0.747255	-9.3713	4.24e-19	5.78e-18	32.4796
MOGAT2	-3.98958	3.28398	-9.36994	4.29e-19	5.84e-18	32.469
ZBTB12	1.51943	1.05102	9.36016	4.63e-19	6.29e-18	32.3932
SOWAHC	-1.12389	5.05673	-9.35727	4.74e-19	6.42e-18	32.3709
GLYATL1	-3.12422	5.53115	-9.34585	5.18e-19	7.01e-18	32.2824
TMEM192	-1.01706	5.18982	-9.34137	5.37e-19	7.25e-18	32.2478
SBF1	1.0075	5.26494	9.33722	5.54e-19	7.48e-18	32.2157
CTHRC1	2.76206	1.08443	9.33533	5.63e-19	7.59e-18	32.2011
DNMT3A	1.13209	4.18163	9.33171	5.79e-19	7.8e-18	32.1731
MBNL2	-1.33439	5.4218	-9.32873	5.93e-19	7.97e-18	32.1501
FNIP2	-1.57461	4.96049	-9.32844	5.94e-19	7.98e-18	32.1479
CD226	-1.79376	0.114527	-9.31743	6.47e-19	8.69e-18	32.0628
GRM8	-2.88494	-1.57939	-9.31487	6.61e-19	8.84e-18	32.043
APOL6	-1.30797	6.4506	-9.31468	6.62e-19	8.85e-18	32.0416
H2AFZ	1.02794	6.22968	9.31238	6.74e-19	9e-18	32.0239
ATP11C	-1.57055	4.33152	-9.31174	6.77e-19	9.04e-18	32.0189
GGT5	-2.25574	3.91611	-9.30592	7.08e-19	9.43e-18	31.974
SOGA1	1.32094	3.58054	9.30004	7.42e-19	9.86e-18	31.9287
THEM5	1.53999	1.18896	9.29789	7.54e-19	1e-17	31.9121
RTKN2	2.24469	-0.344431	9.29691	7.6e-19	1.01e-17	31.9045
CYP4A11	-3.2497	7.43075	-9.29198	7.9e-19	1.05e-17	31.8665
GLOD5	-2.22396	0.0170708	-9.28825	8.13e-19	1.08e-17	31.8378
HK3	-1.84366	1.17279	-9.28766	8.17e-19	1.08e-17	31.8332
TGM3	3.5875	1.82935	9.28404	8.41e-19	1.11e-17	31.8053
RNFT2	1.96688	0.0302326	9.26275	9.92e-19	1.3e-17	31.6415
FOXF1	-1.84143	0.389973	-9.25895	1.02e-18	1.34e-17	31.6123
UBXN8	-1.10841	3.70848	-9.24998	1.1e-18	1.43e-17	31.5433
SERPING1	-1.53288	10.9033	-9.24464	1.14e-18	1.49e-17	31.5023
SP6	1.93201	-0.728071	9.24228	1.16e-18	1.51e-17	31.4841
ST3GAL6	-1.78803	4.2268	-9.23573	1.22e-18	1.59e-17	31.4339
CKAP2	1.22538	3.04456	9.23237	1.26e-18	1.63e-17	31.4081
ISOC1	-1.01846	5.4203	-9.23234	1.26e-18	1.63e-17	31.4078
BHLHE40	-1.43372	6.81578	-9.23169	1.26e-18	1.64e-17	31.4028
CYP3A4	-5.76107	6.41615	-9.23105	1.27e-18	1.64e-17	31.398
CAMK2B	-3.33812	0.326308	-9.22559	1.33e-18	1.71e-17	31.3561
JCHAIN	-3.51603	2.24546	-9.2251	1.33e-18	1.72e-17	31.3523
CD14	-1.93862	8.00585	-9.21852	1.4e-18	1.8e-17	31.3019
MTHFD1	-1.66598	7.46111	-9.21754	1.41e-18	1.81e-17	31.2943
ANXA10	-3.06041	2.87951	-9.21218	1.47e-18	1.89e-17	31.2532
ALDH8A1	-2.64721	5.74922	-9.20906	1.51e-18	1.93e-17	31.2293
ALDH9A1	-1.01703	6.94032	-9.20881	1.51e-18	1.93e-17	31.2274
MT-ND1	-1.26927	11.9877	-9.20745	1.53e-18	1.95e-17	31.217
SORL1	-1.73562	6.09075	-9.19567	1.67e-18	2.13e-17	31.1268
KCND3	-3.52874	2.33506	-9.1917	1.72e-18	2.2e-17	31.0964
CYP4A22	-3.19684	5.46258	-9.19162	1.73e-18	2.2e-17	31.0958
C11orf96	-2.09774	3.24748	-9.18844	1.77e-18	2.25e-17	31.0715
TRIM59	1.54425	0.450575	9.1812	1.87e-18	2.37e-17	31.0161
NETO2	1.71157	0.710653	9.17804	1.92e-18	2.43e-17	30.9919
ADGRA3	-1.50291	5.25011	-9.17022	2.04e-18	2.57e-17	30.9322
LMNB2	1.10129	4.25616	9.16289	2.16e-18	2.72e-17	30.8762
ABAT	-2.12633	7.63004	-9.16201	2.17e-18	2.73e-17	30.8695
PMFBP1	1.80103	-0.863357	9.1603	2.2e-18	2.77e-17	30.8564
SHBG	-3.10929	3.56592	-9.15275	2.33e-18	2.92e-17	30.7988
ZIC5	3.25126	-1.06137	9.14475	2.48e-18	3.11e-17	30.7378
FXYD1	-3.50164	2.7773	-9.14467	2.48e-18	3.11e-17	30.7371
TNXB	-2.19689	2.1785	-9.1439	2.5e-18	3.12e-17	30.7313
DMD	-1.63679	4.66444	-9.14174	2.54e-18	3.17e-17	30.7149
CCL3	-1.80208	1.37522	-9.13992	2.58e-18	3.21e-17	30.701
MESP1	1.58376	0.825382	9.13389	2.7e-18	3.36e-17	30.655
KLHL2	-1.14036	3.97952	-9.13126	2.75e-18	3.43e-17	30.6349
CCDC71L	-1.63421	4.14987	-9.13082	2.76e-18	3.44e-17	30.6316
SLC7A11	3.05932	0.81517	9.11157	3.21e-18	3.97e-17	30.4851
CCDC163	1.24393	0.708944	9.10262	3.43e-18	4.25e-17	30.417
PODXL	1.41809	4.68751	9.09857	3.54e-18	4.37e-17	30.3863
C1orf162	-1.46053	2.46932	-9.09697	3.59e-18	4.42e-17	30.3741
AL163636.2	-1.52065	-0.136176	-9.09558	3.63e-18	4.46e-17	30.3635
FAM149A	-1.67431	3.65546	-9.09519	3.64e-18	4.47e-17	30.3606
HOGA1	-2.56621	3.65762	-9.08354	3.98e-18	4.88e-17	30.272
TRAF5	1.34993	2.2277	9.07532	4.24e-18	5.19e-17	30.2097
HMOX1	-1.70287	5.44245	-9.06656	4.53e-18	5.53e-17	30.1433
THBS1	-2.14046	5.9741	-9.06575	4.56e-18	5.56e-17	30.1371
ADRA1B	-2.26612	1.16815	-9.06273	4.67e-18	5.67e-17	30.1142
C6	-2.94149	7.16474	-9.06254	4.68e-18	5.68e-17	30.1128
MT-CYB	-1.34046	12.6144	-9.0491	5.18e-18	6.27e-17	30.011
CCR1	-1.66087	1.74188	-9.04874	5.2e-18	6.28e-17	30.0082
GYS2	-3.7295	4.10798	-9.04626	5.3e-18	6.39e-17	29.9895
KLRD1	-1.71504	0.269986	-9.04583	5.32e-18	6.41e-17	29.9862
TYMS	1.58778	3.59958	9.03229	5.9e-18	7.11e-17	29.8838
SLC9A9	-1.45033	1.5983	-9.03188	5.92e-18	7.12e-17	29.8807
IGFBP4	-1.27963	9.53953	-9.0299	6.01e-18	7.22e-17	29.8657
RAB3B	3.30889	1.89558	9.02779	6.11e-18	7.32e-17	29.8498
ATOH8	-2.68383	2.85002	-9.02378	6.3e-18	7.53e-17	29.8194
TPM2	1.54298	4.71615	9.02228	6.37e-18	7.61e-17	29.8081
INKA1	1.21882	0.152352	9.00861	7.07e-18	8.42e-17	29.7048
PHF19	1.22202	3.08918	9.00601	7.22e-18	8.59e-17	29.6852
ATAD2	1.39727	4.96105	9.00459	7.29e-18	8.67e-17	29.6745
PHLDB2	-1.16092	4.6286	-8.99746	7.7e-18	9.13e-17	29.6207
KCNJ15	-2.04159	-0.0531053	-8.99376	7.92e-18	9.37e-17	29.5928
HS3ST3B1	-2.0899	4.37919	-8.99329	7.95e-18	9.4e-17	29.5893
ANGPTL1	-2.70881	1.36421	-8.99009	8.15e-18	9.62e-17	29.5651
SLAIN1	-2.64028	0.273759	-8.98864	8.24e-18	9.72e-17	29.5542
HIBCH	-1.02002	5.44897	-8.97982	8.82e-18	1.03e-16	29.4877
PTP4A3	1.92556	3.72742	8.97347	9.25e-18	1.08e-16	29.4399
PROM1	-3.51015	-0.919825	-8.96848	9.61e-18	1.12e-16	29.4024
CDHR2	-4.04776	2.82489	-8.96615	9.79e-18	1.14e-16	29.3849
CCNE2	1.59185	0.376132	8.96218	1.01e-17	1.18e-16	29.355
UBD	2.66544	4.93761	8.95652	1.05e-17	1.23e-16	29.3124
GOT2	-1.21991	7.77797	-8.95355	1.08e-17	1.25e-16	29.2901
STAB1	-1.26636	5.44944	-8.95249	1.09e-17	1.26e-16	29.2821
JCAD	1.41919	3.8078	8.94962	1.11e-17	1.29e-16	29.2606
DTX1	-2.7199	3.17674	-8.94647	1.14e-17	1.32e-16	29.2369
PTPN13	-2.22254	-0.0112579	-8.94112	1.18e-17	1.37e-16	29.1967
TESMIN	1.8805	0.510793	8.93539	1.24e-17	1.43e-16	29.1537
SVEP1	-2.71951	1.37247	-8.93386	1.25e-17	1.45e-16	29.1422
DNM3	1.26956	0.235721	8.93255	1.26e-17	1.46e-16	29.1323
ARID3C	-2.17303	1.15182	-8.93156	1.27e-17	1.47e-16	29.1249
SLCO4C1	-3.55152	0.0816914	-8.93043	1.28e-17	1.48e-16	29.1164
SERPINA11	-3.16463	6.25906	-8.92654	1.32e-17	1.52e-16	29.0873
PCBP4	1.02824	4.28144	8.92473	1.34e-17	1.54e-16	29.0737
FYN	-1.14209	4.09868	-8.90646	1.54e-17	1.76e-16	28.9368
ARHGAP39	1.2616	1.56911	8.89927	1.63e-17	1.85e-16	28.8829
RDH16	-3.40667	6.14215	-8.89396	1.7e-17	1.93e-16	28.8431
PDGFRA	-3.21211	2.06408	-8.89297	1.71e-17	1.94e-16	28.8357
TMEM82	-3.11799	2.77865	-8.89092	1.73e-17	1.97e-16	28.8204
B4GALNT1	2.75781	1.14135	8.8863	1.8e-17	2.04e-16	28.7859
ALPL	-2.62165	4.57389	-8.88516	1.81e-17	2.05e-16	28.7774
PPM1K	-1.56861	2.70359	-8.88476	1.82e-17	2.06e-16	28.7743
CCDC28B	1.70838	1.55176	8.88214	1.85e-17	2.1e-16	28.7547
HMGB2	1.17287	4.99944	8.88014	1.88e-17	2.12e-16	28.7398
CRYGS	1.22166	0.409748	8.87971	1.89e-17	2.13e-16	28.7366
NMB	1.57137	1.394	8.87905	1.9e-17	2.14e-16	28.7317
ITPRID2	-1.02841	6.05	-8.87896	1.9e-17	2.14e-16	28.731
PON3	-2.02098	6.6115	-8.87843	1.91e-17	2.15e-16	28.727
KCNN3	1.38363	1.20591	8.86652	2.09e-17	2.34e-16	28.6381
GNAZ	2.65896	2.08042	8.86534	2.11e-17	2.36e-16	28.6292
MRC1	-2.17647	3.69065	-8.86244	2.15e-17	2.41e-16	28.6075
UGT2B7	-2.99795	7.12846	-8.85064	2.35e-17	2.63e-16	28.5195
COLEC11	-2.42583	4.37541	-8.84958	2.37e-17	2.65e-16	28.5116
CYS1	-2.83844	-0.739925	-8.8457	2.44e-17	2.73e-16	28.4827
G6PD	1.82733	4.30469	8.84538	2.45e-17	2.73e-16	28.4803
DNA2	1.22761	1.43473	8.84208	2.51e-17	2.8e-16	28.4557
SARDH	-1.85335	6.31361	-8.84092	2.53e-17	2.82e-16	28.4471
ACACB	-1.47775	6.08118	-8.83388	2.67e-17	2.97e-16	28.3946
LONRF1	-1.09847	2.74274	-8.82568	2.84e-17	3.15e-16	28.3335
CA2	-1.94808	5.2567	-8.8201	2.97e-17	3.28e-16	28.292
JAG2	1.4199	2.94164	8.81442	3.1e-17	3.42e-16	28.2498
LONP2	-1.03616	6.76613	-8.81221	3.15e-17	3.47e-16	28.2334
SLC26A2	1.06916	2.78228	8.80739	3.26e-17	3.59e-16	28.1975
POLE2	1.34102	1.60408	8.80705	3.27e-17	3.6e-16	28.195
CDC25A	1.71498	1.21221	8.79563	3.57e-17	3.92e-16	28.1102
ACOT2	-1.23715	4.75313	-8.79142	3.68e-17	4.04e-16	28.0789
ERRFI1	-1.754	7.65959	-8.78927	3.74e-17	4.1e-16	28.0629
TTC39B	-1.44328	2.79938	-8.78832	3.77e-17	4.13e-16	28.0559
TP53I3	1.55337	4.23177	8.78236	3.94e-17	4.31e-16	28.0117
NRG1	-3.50873	0.53617	-8.77817	4.07e-17	4.45e-16	27.9806
SHPK	-1.12173	2.48844	-8.77412	4.19e-17	4.58e-16	27.9505
C8A	-2.60028	7.13525	-8.77363	4.21e-17	4.59e-16	27.9469
RAB11FIP4	1.51716	4.57585	8.76068	4.64e-17	5.04e-16	27.851
BACH2	-1.92987	0.880388	-8.75972	4.67e-17	5.08e-16	27.8439
COL4A2	1.40907	7.25209	8.75707	4.77e-17	5.17e-16	27.8242
TBX15	-2.88839	2.80769	-8.75691	4.77e-17	5.17e-16	27.8231
PCK1	-3.77014	8.11709	-8.756	4.81e-17	5.2e-16	27.8163
ALAS1	-1.57395	7.64072	-8.75354	4.9e-17	5.29e-16	27.7981
AGTR1	-1.88436	4.71991	-8.74131	5.37e-17	5.78e-16	27.7076
PAQR4	1.59543	2.0544	8.73768	5.52e-17	5.93e-16	27.6808
ARHGAP20	-1.95619	-0.485525	-8.73229	5.74e-17	6.17e-16	27.6409
H2AFX	1.23212	4.24204	8.72028	6.28e-17	6.72e-16	27.5523
SAMD5	-3.05439	1.46539	-8.71869	6.36e-17	6.8e-16	27.5405
SORT1	1.51018	5.12151	8.7181	6.39e-17	6.82e-16	27.5362
BCHE	-3.09314	4.27945	-8.71771	6.41e-17	6.84e-16	27.5333
CCDC3	-1.73388	3.25307	-8.71144	6.71e-17	7.15e-16	27.487
FAM222A	1.47277	3.23937	8.70777	6.9e-17	7.35e-16	27.4599
ZNF581	1.04446	3.2921	8.7071	6.94e-17	7.38e-16	27.455
LAMC1	1.16161	6.66289	8.70427	7.08e-17	7.52e-16	27.4342
TLCD1	1.3413	3.10272	8.70176	7.22e-17	7.66e-16	27.4157
BBOX1	-3.34307	2.18665	-8.69933	7.35e-17	7.78e-16	27.3978
SLC19A3	-2.12292	3.25982	-8.69882	7.38e-17	7.81e-16	27.3939
ABCC9	-2.24494	3.8862	-8.69312	7.7e-17	8.13e-16	27.352
HMGA1	1.44113	5.70088	8.69102	7.82e-17	8.25e-16	27.3365
DNMT3B	1.37932	0.920113	8.68708	8.06e-17	8.47e-16	27.3075
PLK3	-1.2204	2.58603	-8.67496	8.82e-17	9.24e-16	27.2183
DMGDH	-2.25802	5.85093	-8.67474	8.83e-17	9.25e-16	27.2167
C2CD4B	-1.88404	-1.05691	-8.67276	8.97e-17	9.38e-16	27.2021
TEK	-1.95335	1.94363	-8.67201	9.02e-17	9.42e-16	27.1967
IGF2BP1	4.25259	0.698796	8.67021	9.14e-17	9.53e-16	27.1834
TMEM154	-2.2928	0.530529	-8.66659	9.39e-17	9.78e-16	27.1568
SLC50A1	1.05834	5.92074	8.66611	9.42e-17	9.81e-16	27.1532
FGL2	-1.55783	3.53648	-8.66344	9.61e-17	9.99e-16	27.1336
ASIC3	1.53106	-0.0352308	8.65962	9.89e-17	1.03e-15	27.1056
PTPN3	-1.10171	5.27011	-8.65752	1e-16	1.04e-15	27.0902
MAT1A	-2.32489	9.2407	-8.65441	1.03e-16	1.06e-15	27.0673
ASPG	-4.11149	3.0253	-8.65188	1.05e-16	1.08e-15	27.0487
FSTL4	2.62175	-0.636785	8.64893	1.07e-16	1.11e-15	27.0271
MT-ND3	-1.319	10.6634	-8.64821	1.08e-16	1.11e-15	27.0218
GLUD1	-1.37551	8.56722	-8.64796	1.08e-16	1.11e-15	27.0199
FAM151A	-3.32289	-0.187068	-8.64734	1.08e-16	1.12e-15	27.0154
RPS6KL1	1.72916	1.68389	8.63866	1.16e-16	1.19e-15	26.9517
CITED2	-1.23553	4.84453	-8.63222	1.21e-16	1.24e-15	26.9045
NAMPT	-1.64503	6.81579	-8.62926	1.24e-16	1.27e-15	26.8828
STX11	-1.67205	0.673277	-8.62737	1.26e-16	1.29e-15	26.8689
PCCA	-1.11709	5.4933	-8.62448	1.28e-16	1.31e-15	26.8478
SDC4	-1.20272	8.39001	-8.60816	1.45e-16	1.48e-15	26.7283
ACSM5	-2.94262	5.47145	-8.60193	1.52e-16	1.55e-15	26.6828
L3MBTL1	1.22064	0.86729	8.60066	1.53e-16	1.56e-15	26.6734
FREM1	-2.48156	-1.63076	-8.59589	1.59e-16	1.61e-15	26.6386
DUSP9	2.95262	2.22445	8.5958	1.59e-16	1.61e-15	26.638
HAAO	-1.74654	6.65766	-8.59219	1.63e-16	1.66e-15	26.6116
STOM	-1.18389	7.88856	-8.58341	1.74e-16	1.76e-15	26.5475
TSPYL5	-1.69663	0.254813	-8.58024	1.78e-16	1.8e-15	26.5243
MT-ND6	-1.64885	9.92122	-8.57209	1.9e-16	1.91e-15	26.4648
PPP1R15A	-1.07229	4.99596	-8.57082	1.91e-16	1.93e-15	26.4556
VKORC1	-1.12485	5.78238	-8.56936	1.93e-16	1.95e-15	26.4449
PLA2G6	1.14181	3.40589	8.56509	2e-16	2e-15	26.4138
NCKAP5	-1.86231	0.727665	-8.56432	2.01e-16	2.01e-15	26.4082
DNAJC12	-2.36195	3.01549	-8.56188	2.04e-16	2.05e-15	26.3904
MSX1	1.46337	0.352935	8.55811	2.1e-16	2.1e-15	26.3629
AKR1D1	-3.52077	4.51114	-8.55795	2.1e-16	2.1e-15	26.3618
AVPI1	-1.20235	4.34538	-8.55587	2.14e-16	2.13e-15	26.3466
ADH4	-4.31486	7.52402	-8.55572	2.14e-16	2.13e-15	26.3455
HSPB1	1.35991	8.48064	8.55457	2.16e-16	2.15e-15	26.3371
FANCC	-1.22853	3.67657	-8.55339	2.18e-16	2.17e-15	26.3285
ACOX1	-1.16039	7.60936	-8.55131	2.21e-16	2.2e-15	26.3134
IDUA	1.05093	3.65976	8.54573	2.3e-16	2.29e-15	26.2727
CYP3A43	-2.77667	0.639819	-8.53955	2.41e-16	2.39e-15	26.2278
FABP5	1.52273	1.91481	8.53903	2.42e-16	2.4e-15	26.224
TDO2	-3.1964	6.42081	-8.53475	2.5e-16	2.47e-15	26.1929
DUSP10	-1.25827	4.86725	-8.52818	2.62e-16	2.59e-15	26.1451
SYDE2	-1.5046	0.672672	-8.52465	2.69e-16	2.66e-15	26.1195
COBLL1	-1.3906	5.89198	-8.52173	2.75e-16	2.71e-15	26.0983
FOLH1	-1.88024	2.9636	-8.52152	2.75e-16	2.71e-15	26.0968
GPD1	-2.5575	5.32733	-8.5177	2.83e-16	2.79e-15	26.069
ADGRG6	-1.84733	5.33172	-8.51609	2.87e-16	2.82e-15	26.0573
HIVEP1	-1.08351	3.78013	-8.51391	2.91e-16	2.87e-15	26.0415
NADK2	-1.29289	7.30197	-8.51263	2.94e-16	2.89e-15	26.0322
AKR1C3	1.36809	7.96729	8.51176	2.96e-16	2.9e-15	26.0259
SLC25A20	-1.13996	5.76568	-8.50888	3.02e-16	2.96e-15	26.005
QDPR	-1.27891	6.5511	-8.50786	3.05e-16	2.98e-15	25.9976
SIX4	2.19987	-0.801036	8.50616	3.08e-16	3.01e-15	25.9852
KLK11	-2.16125	-2.96838	-8.50599	3.09e-16	3.01e-15	25.984
CCL4	-1.71249	1.62002	-8.5031	3.16e-16	3.08e-15	25.9631
CD81	-1.23486	8.69882	-8.50136	3.2e-16	3.11e-15	25.9504
WHRN	1.24678	2.51988	8.49957	3.24e-16	3.15e-15	25.9375
ABCA1	-1.08496	5.8625	-8.48323	3.65e-16	3.54e-15	25.8191
MT-ND2	-1.23618	12.1097	-8.482	3.69e-16	3.57e-15	25.8102
B3GALT5	-2.33608	-2.21317	-8.47835	3.79e-16	3.66e-15	25.7837
INKA2	1.07921	1.88738	8.47362	3.92e-16	3.79e-15	25.7495
PNP	-1.04213	4.76497	-8.47273	3.95e-16	3.8e-15	25.7431
SHMT1	-1.75769	7.51667	-8.46675	4.12e-16	3.97e-15	25.6999
BCL9	1.1248	3.8531	8.45812	4.39e-16	4.23e-15	25.6375
AQP7	-1.55912	3.05006	-8.45612	4.46e-16	4.29e-15	25.623
CXCL2	-2.3372	4.31983	-8.45596	4.46e-16	4.29e-15	25.6219
MUM1L1	-2.95431	-1.19577	-8.45183	4.6e-16	4.41e-15	25.592
ADAMTSL2	-2.55197	3.52357	-8.45047	4.65e-16	4.45e-15	25.5822
SIGLEC1	-1.57317	2.93051	-8.45042	4.65e-16	4.45e-15	25.5818
TRPV4	-2.4814	1.65544	-8.45001	4.66e-16	4.46e-15	25.5789
THBD	-1.54726	2.91992	-8.44684	4.77e-16	4.56e-15	25.556
SLC52A2	1.15091	4.35586	8.44321	4.9e-16	4.67e-15	25.5298
LRCOL1	-3.19281	0.801446	-8.43925	5.04e-16	4.81e-15	25.5012
MT-ND5	-1.55436	11.1762	-8.43903	5.05e-16	4.81e-15	25.4997
ANK3	-2.17788	1.93985	-8.43859	5.07e-16	4.82e-15	25.4965
MCM8	1.12934	2.54419	8.43587	5.17e-16	4.91e-15	25.4769
GAREM1	-1.30787	3.08116	-8.4332	5.27e-16	5.01e-15	25.4576
CD300A	-1.44087	1.98956	-8.43246	5.3e-16	5.03e-15	25.4523
RIDA	-1.7234	7.63592	-8.43222	5.31e-16	5.04e-15	25.4506
ROBO1	2.20906	4.89674	8.43198	5.32e-16	5.04e-15	25.4488
FAH	-1.20789	7.25428	-8.43128	5.35e-16	5.06e-15	25.4438
MAMSTR	1.39691	-0.245592	8.42608	5.55e-16	5.25e-15	25.4063
CLSTN2	-2.32421	-0.0721633	-8.42605	5.56e-16	5.25e-15	25.4061
SLC28A3	-2.17728	-2.3664	-8.42596	5.56e-16	5.25e-15	25.4054
SAPCD2	1.93198	0.475407	8.4249	5.6e-16	5.29e-15	25.3978
NFAM1	-1.50054	1.71696	-8.41722	5.93e-16	5.58e-15	25.3425
CDNF	-1.20301	0.981268	-8.39953	6.75e-16	6.32e-15	25.2152
CSPG5	1.75411	-0.354751	8.39714	6.86e-16	6.42e-15	25.198
HP	-3.24918	11.8687	-8.39632	6.91e-16	6.46e-15	25.1921
PINK1	-1.25805	4.82735	-8.39249	7.1e-16	6.63e-15	25.1646
ABHD6	-1.30806	4.76705	-8.38818	7.33e-16	6.83e-15	25.1337
PDGFA	1.70558	3.79089	8.38459	7.52e-16	7e-15	25.1078
PEX11G	-1.39105	2.68572	-8.38174	7.68e-16	7.14e-15	25.0874
THRSP	-4.51603	2.89505	-8.37938	7.81e-16	7.26e-15	25.0704
FHL1	-1.48913	3.72101	-8.37926	7.82e-16	7.26e-15	25.0696
DCAF11	-1.02431	6.95671	-8.37554	8.04e-16	7.45e-15	25.0429
BGN	-2.00352	7.10159	-8.37271	8.2e-16	7.6e-15	25.0226
NAALADL2	-1.9429	0.932952	-8.37177	8.26e-16	7.65e-15	25.0159
PSPH	1.18059	3.98236	8.36854	8.46e-16	7.83e-15	24.9927
MFAP4	-3.27022	2.32664	-8.36793	8.49e-16	7.86e-15	24.9883
PROCA1	1.2384	0.0451269	8.35989	9.01e-16	8.32e-15	24.9307
RAB25	-3.04313	-1.64581	-8.35481	9.35e-16	8.61e-15	24.8943
BICDL1	1.99368	2.66595	8.34516	1e-15	9.2e-15	24.8252
SCN4A	1.66058	0.125449	8.34111	1.03e-15	9.46e-15	24.7962
YPEL2	-1.00645	4.42484	-8.3293	1.12e-15	1.03e-14	24.7118
EFNA3	1.61142	0.804464	8.32426	1.17e-15	1.06e-14	24.6758
GSTM5	-2.39544	-0.971148	-8.31575	1.24e-15	1.13e-14	24.615
CHST7	-1.5008	2.12913	-8.30518	1.34e-15	1.22e-14	24.5396
CEP72	1.09638	2.01199	8.30282	1.36e-15	1.24e-14	24.5228
DDX11	1.22615	3.007	8.30149	1.38e-15	1.25e-14	24.5133
SEMA6D	-1.65555	0.620987	-8.29899	1.4e-15	1.27e-14	24.4955
KANK4	-2.85183	-1.04659	-8.29757	1.42e-15	1.28e-14	24.4854
SQLE	1.78235	5.75871	8.29694	1.42e-15	1.29e-14	24.4809
QRICH2	1.29488	1.77306	8.29433	1.45e-15	1.31e-14	24.4623
PRR18	-2.055	1.20044	-8.29036	1.49e-15	1.35e-14	24.434
INCENP	1.10994	2.70478	8.28639	1.54e-15	1.38e-14	24.4057
LPIN2	-1.278	7.13482	-8.2857	1.54e-15	1.39e-14	24.4008
TGFBR3	-1.52485	4.07579	-8.28519	1.55e-15	1.39e-14	24.3972
RASGRP4	-1.13313	-0.145914	-8.28035	1.6e-15	1.44e-14	24.3628
CYP2C9	-3.12697	7.47173	-8.28005	1.61e-15	1.44e-14	24.3606
CNTN3	-3.04703	-0.81675	-8.2789	1.62e-15	1.46e-14	24.3524
GABARAPL1	-1.44021	6.10954	-8.27751	1.64e-15	1.47e-14	24.3425
SYNPO2	-1.57193	2.66591	-8.27671	1.65e-15	1.48e-14	24.3368
TIGD7	1.02004	0.307872	8.27272	1.7e-15	1.52e-14	24.3084
SFN	3.33756	2.67173	8.26382	1.81e-15	1.61e-14	24.2452
MT-CO1	-1.18016	13.7897	-8.26359	1.81e-15	1.62e-14	24.2436
SMYD3	1.19788	2.24686	8.26299	1.82e-15	1.62e-14	24.2393
PDLIM7	1.07256	3.92749	8.26219	1.83e-15	1.63e-14	24.2336
SPIRE2	1.11521	3.68837	8.25967	1.86e-15	1.66e-14	24.2157
LRG1	-2.06048	8.50519	-8.25818	1.88e-15	1.67e-14	24.2051
AGXT2	-2.70153	4.46174	-8.25789	1.89e-15	1.68e-14	24.203
SERPINB8	-1.62403	2.85801	-8.25635	1.91e-15	1.69e-14	24.1921
PRKAG2	-1.14203	4.23704	-8.25228	1.96e-15	1.74e-14	24.1632
CLRN3	-3.65753	1.57309	-8.25169	1.97e-15	1.75e-14	24.159
CTSO	-1.23257	5.56269	-8.24188	2.12e-15	1.87e-14	24.0894
DHTKD1	-1.32027	6.8955	-8.23893	2.16e-15	1.91e-14	24.0685
LAP3	-1.11048	6.65516	-8.23617	2.21e-15	1.94e-14	24.0489
HAGHL	1.81275	-0.0579067	8.22615	2.37e-15	2.08e-14	23.978
RBL1	1.112	2.0109	8.21894	2.5e-15	2.19e-14	23.9269
SLC46A3	-2.30473	4.60089	-8.21603	2.55e-15	2.23e-14	23.9063
VTCN1	-3.02113	-1.31213	-8.21478	2.57e-15	2.25e-14	23.8975
KIAA1614	1.41734	0.30937	8.20893	2.68e-15	2.34e-14	23.8561
P4HA2	1.20592	4.60273	8.20588	2.74e-15	2.39e-14	23.8345
RNF150	-2.13006	-0.564805	-8.20047	2.85e-15	2.48e-14	23.7963
BOP1	1.27307	5.72668	8.19928	2.88e-15	2.5e-14	23.7879
STRIP2	1.75681	0.103055	8.19908	2.88e-15	2.51e-14	23.7864
HEY1	1.16137	2.02709	8.18751	3.13e-15	2.72e-14	23.7047
ZNF572	1.24823	0.508204	8.18681	3.15e-15	2.73e-14	23.6998
LDHD	-1.79863	5.93885	-8.18597	3.17e-15	2.75e-14	23.6939
SAA4	-2.94225	5.55997	-8.18061	3.29e-15	2.85e-14	23.6561
MXRA5	-2.11068	1.98471	-8.18055	3.29e-15	2.85e-14	23.6557
EXPH5	-2.6128	1.35773	-8.17976	3.31e-15	2.87e-14	23.6501
ANXA2R	1.27176	0.62033	8.17803	3.35e-15	2.9e-14	23.6379
AMOTL2	-1.27881	4.31983	-8.17502	3.42e-15	2.96e-14	23.6167
HGFAC	-4.2495	4.11732	-8.17232	3.49e-15	3.01e-14	23.5976
PSAT1	-1.75467	5.90146	-8.17099	3.52e-15	3.04e-14	23.5883
TLR3	-1.43979	2.54127	-8.17001	3.55e-15	3.06e-14	23.5813
SIPA1L3	1.02619	4.28929	8.16807	3.6e-15	3.1e-14	23.5676
PCDH17	1.27398	2.18224	8.15707	3.89e-15	3.35e-14	23.4902
ZG16	-2.9904	2.32788	-8.15696	3.9e-15	3.35e-14	23.4894
MPDZ	-1.60256	5.13309	-8.15516	3.95e-15	3.39e-14	23.4767
GLA	1.0063	4.07997	8.15206	4.04e-15	3.46e-14	23.455
PROZ	-2.42556	3.65068	-8.14851	4.14e-15	3.55e-14	23.43
GPR65	-1.38864	0.466742	-8.14748	4.17e-15	3.57e-14	23.4227
ADH1B	-3.15582	9.42611	-8.1424	4.33e-15	3.7e-14	23.387
AFM	-2.90738	6.32943	-8.14086	4.37e-15	3.74e-14	23.3762
C6orf48	1.01598	5.50375	8.13696	4.5e-15	3.84e-14	23.3488
LRRK2	-1.62636	2.1095	-8.12834	4.78e-15	4.07e-14	23.2882
WEE1	-1.0764	4.73848	-8.1253	4.89e-15	4.15e-14	23.2669
MYCT1	-1.12834	2.32426	-8.11966	5.09e-15	4.32e-14	23.2273
ABHD2	-1.21146	7.4799	-8.11377	5.31e-15	4.5e-14	23.186
CKS2	1.18414	3.58878	8.11167	5.39e-15	4.56e-14	23.1713
C20orf204	2.66849	0.109864	8.10926	5.48e-15	4.63e-14	23.1544
DNMT1	1.00618	4.83089	8.10736	5.55e-15	4.69e-14	23.1411
OAF	-1.09353	7.52207	-8.1007	5.82e-15	4.92e-14	23.0944
DLG2	-1.49697	0.0239546	-8.09643	6e-15	5.06e-14	23.0645
GLYAT	-3.94391	4.4975	-8.09424	6.1e-15	5.14e-14	23.0492
IYD	-2.54839	3.43637	-8.0857	6.48e-15	5.45e-14	22.9894
KLF13	1.07242	5.51105	8.08088	6.71e-15	5.64e-14	22.9557
LEF1	2.31577	1.37117	8.07731	6.88e-15	5.78e-14	22.9307
KCNJ10	-2.12457	-0.988995	-8.07707	6.89e-15	5.78e-14	22.9291
HPX	-2.54438	10.4825	-8.07412	7.04e-15	5.89e-14	22.9085
CDKN2B	1.32952	2.39864	8.0694	7.28e-15	6.09e-14	22.8755
CYB5D2	-1.04975	4.22257	-8.06654	7.43e-15	6.2e-14	22.8555
AZGP1	-2.33514	9.01632	-8.06582	7.46e-15	6.23e-14	22.8505
ORM1	-2.38717	10.584	-8.0647	7.52e-15	6.28e-14	22.8427
PCK2	-1.74479	8.20256	-8.06094	7.73e-15	6.43e-14	22.8164
TMEM45A	-2.57307	3.93192	-8.0594	7.81e-15	6.49e-14	22.8057
RAB20	-1.17383	4.44512	-8.05758	7.91e-15	6.57e-14	22.793
DLL4	1.02922	3.37589	8.05214	8.22e-15	6.82e-14	22.7551
IQCD	1.73307	-0.504122	8.05058	8.32e-15	6.89e-14	22.7442
RGMA	1.46995	-0.621394	8.0504	8.33e-15	6.89e-14	22.7429
C1orf198	1.05034	5.2881	8.04738	8.51e-15	7.03e-14	22.7219
HES6	1.16881	2.45001	8.04685	8.54e-15	7.06e-14	22.7182
CDA	-2.25204	3.2901	-8.04237	8.81e-15	7.28e-14	22.687
SPATC1L	2.09101	1.32133	8.03964	8.99e-15	7.4e-14	22.6679
PTGIR	-1.60167	0.93241	-8.0386	9.05e-15	7.45e-14	22.6607
PLEKHG2	1.00566	3.42377	8.0376	9.12e-15	7.5e-14	22.6537
BRCA2	1.19343	1.14767	8.03597	9.22e-15	7.58e-14	22.6424
BRICD5	1.15723	0.550529	8.03105	9.55e-15	7.84e-14	22.6081
ALB	-2.42633	15.1267	-8.02886	9.7e-15	7.95e-14	22.5929
ALDH4A1	-1.33895	7.83902	-8.02306	1.01e-14	8.28e-14	22.5526
RTL5	-1.72977	1.58488	-8.02202	1.02e-14	8.33e-14	22.5453
FAM167B	-1.14566	2.09679	-8.02021	1.03e-14	8.43e-14	22.5327
LYPD1	2.72682	0.529312	8.01944	1.04e-14	8.47e-14	22.5274
PDCD1LG2	-1.55496	-0.198481	-8.01617	1.06e-14	8.65e-14	22.5047
ARHGAP42	-1.17868	2.66699	-8.01124	1.1e-14	8.95e-14	22.4704
TSPAN7	-1.35623	3.21608	-8.00814	1.12e-14	9.13e-14	22.4489
PRRX1	1.83353	0.446339	8.00693	1.13e-14	9.21e-14	22.4405
ZHX1-C8orf76	1.12613	-0.205168	8.00617	1.14e-14	9.25e-14	22.4352
SAMD11	-2.19725	-0.114505	-8.00499	1.15e-14	9.32e-14	22.427
PHGDH	-2.2648	5.44443	-7.99589	1.22e-14	9.92e-14	22.3639
PXMP2	-1.3645	5.70739	-7.99373	1.24e-14	1.01e-13	22.3489
ADH6	-2.13623	7.17673	-7.98339	1.34e-14	1.08e-13	22.2772
SLC27A5	-2.59522	7.82746	-7.9807	1.36e-14	1.1e-13	22.2586
RNF144B	-1.15905	3.78708	-7.97976	1.37e-14	1.11e-13	22.2521
NCAPG2	1.02318	3.15524	7.97107	1.46e-14	1.17e-13	22.1919
ZDBF2	-2.11251	0.358049	-7.9698	1.47e-14	1.18e-13	22.1831
ABCA8	-2.6096	3.59028	-7.96644	1.51e-14	1.21e-13	22.1599
PRIM1	1.09978	2.60161	7.96316	1.54e-14	1.24e-13	22.1372
TLDC2	1.72828	0.490346	7.96039	1.57e-14	1.26e-13	22.118
BAIAP2L2	2.16901	2.2066	7.95712	1.61e-14	1.29e-13	22.0954
BLNK	-1.13023	4.14772	-7.94953	1.7e-14	1.36e-13	22.0429
FAXDC2	-1.52613	5.84892	-7.94918	1.7e-14	1.36e-13	22.0406
ANKRD13B	1.2953	0.599368	7.93562	1.87e-14	1.49e-13	21.9469
EIF4E3	-1.62904	2.75082	-7.92836	1.97e-14	1.57e-13	21.8969
IL2RB	-1.57774	2.24932	-7.92784	1.98e-14	1.57e-13	21.8933
TENT5C	-1.66162	2.88979	-7.92782	1.98e-14	1.57e-13	21.8932
SSC5D	-1.95857	0.61045	-7.92706	1.99e-14	1.58e-13	21.8879
SFI1	1.05657	3.4067	7.92682	1.99e-14	1.58e-13	21.8863
MAPK8IP2	2.32498	1.81137	7.92492	2.02e-14	1.6e-13	21.8732
B3GAT1	-2.99137	0.0725346	-7.92271	2.05e-14	1.62e-13	21.8579
GABRB3	-3.31892	-0.837472	-7.92262	2.05e-14	1.62e-13	21.8573
TRANK1	-1.1643	4.24682	-7.91678	2.14e-14	1.69e-13	21.8171
DLK2	1.31726	-0.03496	7.91608	2.15e-14	1.69e-13	21.8123
MBL2	-2.89704	5.29386	-7.91382	2.18e-14	1.72e-13	21.7967
ORM2	-2.17848	8.88958	-7.91218	2.21e-14	1.74e-13	21.7855
ARSD	-1.13741	5.66206	-7.9093	2.25e-14	1.77e-13	21.7656
ABLIM3	-1.26606	5.65667	-7.89957	2.41e-14	1.89e-13	21.6987
PLA2R1	-1.73314	-0.134365	-7.89894	2.42e-14	1.9e-13	21.6944
DEPDC7	-1.63602	4.15398	-7.89558	2.48e-14	1.94e-13	21.6713
GPR146	-1.48147	0.393132	-7.88958	2.58e-14	2.02e-13	21.63
BFSP1	1.17471	-0.186179	7.88489	2.67e-14	2.09e-13	21.5978
FAM83H	1.19442	6.15239	7.8813	2.74e-14	2.14e-13	21.5732
C19orf48	1.08379	5.20934	7.87999	2.76e-14	2.16e-13	21.5642
SUCNR1	-1.66289	1.17093	-7.86754	3.01e-14	2.35e-13	21.4788
EHHADH	-1.85832	7.16553	-7.86685	3.03e-14	2.36e-13	21.4741
TMEM164	1.18109	3.43675	7.86506	3.07e-14	2.38e-13	21.4618
HIBADH	-1.04544	6.39187	-7.86438	3.08e-14	2.39e-13	21.4572
AMDHD1	-1.97581	5.46858	-7.85871	3.2e-14	2.49e-13	21.4183
RAB6B	1.11615	1.41615	7.85807	3.22e-14	2.49e-13	21.4139
SMAD6	-1.22457	2.30879	-7.85275	3.34e-14	2.58e-13	21.3775
FAM229B	-1.34575	1.88873	-7.84416	3.55e-14	2.73e-13	21.3188
C8B	-2.15454	7.78812	-7.83851	3.69e-14	2.84e-13	21.2801
PDE4C	1.39194	0.058984	7.83474	3.79e-14	2.91e-13	21.2543
WDR72	-2.57916	3.3564	-7.83322	3.83e-14	2.93e-13	21.244
PDK4	-2.07824	6.28123	-7.8313	3.88e-14	2.97e-13	21.2309
WFDC1	-1.69971	0.181819	-7.82499	4.05e-14	3.1e-13	21.1877
RNF180	-1.6674	1.12583	-7.823	4.11e-14	3.14e-13	21.1742
GIPC2	-1.8661	3.15343	-7.81666	4.29e-14	3.28e-13	21.1309
FOXD2	1.58097	0.574268	7.81291	4.41e-14	3.36e-13	21.1053
CP	-2.11882	8.92645	-7.81092	4.47e-14	3.4e-13	21.0918
RNASE4	-1.54902	3.80614	-7.80575	4.63e-14	3.52e-13	21.0565
PTGER2	-1.52396	-0.562039	-7.80559	4.64e-14	3.52e-13	21.0554
PLXNA1	1.16066	3.82461	7.80553	4.64e-14	3.52e-13	21.0551
CARMIL3	-1.44923	0.133303	-7.80167	4.76e-14	3.62e-13	21.0287
SLC16A2	-1.71066	5.57193	-7.8008	4.79e-14	3.64e-13	21.0228
TMEM145	2.05667	-1.3216	7.79958	4.83e-14	3.66e-13	21.0145
GCGR	-3.85794	3.04707	-7.79634	4.94e-14	3.74e-13	20.9924
NCAM2	-2.34033	-1.33101	-7.79626	4.95e-14	3.74e-13	20.9919
TDRKH	1.1177	3.02843	7.79547	4.97e-14	3.76e-13	20.9865
CTF1	-1.60927	-0.747938	-7.79339	5.05e-14	3.81e-13	20.9724
SGCA	-2.02864	-0.375825	-7.78809	5.24e-14	3.94e-13	20.9363
DCST2	1.41865	0.0775296	7.78713	5.27e-14	3.97e-13	20.9298
NES	1.09015	4.7074	7.78637	5.3e-14	3.99e-13	20.9246
NRIP2	1.07815	1.09738	7.78166	5.47e-14	4.11e-13	20.8926
F9	-3.41352	6.37232	-7.77978	5.54e-14	4.16e-13	20.8798
BHMT	-3.22785	6.88457	-7.77717	5.65e-14	4.23e-13	20.8621
SLC35E4	1.09733	0.456316	7.77716	5.65e-14	4.23e-13	20.862
IQGAP2	-1.08647	6.93649	-7.77278	5.82e-14	4.36e-13	20.8322
ESCO2	1.5511	0.385239	7.76748	6.04e-14	4.51e-13	20.7962
TNFRSF25	1.20736	2.00616	7.75234	6.7e-14	4.99e-13	20.6936
APOL1	-1.24917	7.40727	-7.74697	6.96e-14	5.17e-13	20.6572
SATB1	-1.56144	2.89513	-7.7434	7.13e-14	5.3e-13	20.633
PRRG4	-1.28157	4.33433	-7.73893	7.35e-14	5.46e-13	20.6027
TPK1	-1.05041	1.34128	-7.73843	7.38e-14	5.48e-13	20.5993
SULT1A1	-1.59425	5.956	-7.73655	7.47e-14	5.54e-13	20.5866
PRELP	-2.48592	2.94798	-7.73406	7.6e-14	5.64e-13	20.5698
PRUNE2	-1.73895	-0.0736144	-7.73218	7.7e-14	5.7e-13	20.557
GBP2	1.29749	5.88013	7.73103	7.76e-14	5.74e-13	20.5492
ASPDH	-2.7056	4.43491	-7.72419	8.14e-14	6e-13	20.503
YJEFN3	1.39013	0.235997	7.72406	8.15e-14	6e-13	20.5021
RIBC2	1.88782	-0.850736	7.71614	8.6e-14	6.31e-13	20.4486
DHRS1	-1.30738	5.6776	-7.71279	8.8e-14	6.45e-13	20.4259
CPEB4	-1.04598	5.49448	-7.71068	8.93e-14	6.53e-13	20.4117
GJB3	-2.16497	-1.68541	-7.7036	9.38e-14	6.85e-13	20.3639
PRKCB	-1.55662	1.29727	-7.70259	9.44e-14	6.89e-13	20.3571
ADH1A	-2.71411	7.79991	-7.69148	1.02e-13	7.42e-13	20.2822
RBP7	1.59415	2.71374	7.69096	1.02e-13	7.44e-13	20.2787
PLIN1	-2.1032	2.22276	-7.68554	1.06e-13	7.71e-13	20.2422
REXO5	1.10011	1.82105	7.68002	1.1e-13	7.99e-13	20.205
SELE	-2.12158	0.270116	-7.67776	1.12e-13	8.11e-13	20.1898
PAIP2B	-2.18378	3.09076	-7.67743	1.12e-13	8.12e-13	20.1876
COLCA2	1.82671	0.334989	7.6757	1.14e-13	8.22e-13	20.176
CATSPER2	1.10498	0.148161	7.67397	1.15e-13	8.31e-13	20.1643
TNN	-1.62146	-0.218528	-7.6732	1.16e-13	8.35e-13	20.1591
PAPSS2	-1.23129	5.75662	-7.67285	1.16e-13	8.36e-13	20.1568
TIAM1	-1.54518	1.74616	-7.67212	1.16e-13	8.4e-13	20.1519
TMEM47	-1.59686	3.5184	-7.66415	1.23e-13	8.86e-13	20.0983
CLYBL	-1.1868	4.77938	-7.65428	1.31e-13	9.46e-13	20.032
PGLYRP2	-2.84344	6.00309	-7.64247	1.43e-13	1.02e-12	19.9527
MRAP2	2.63562	0.148089	7.63807	1.47e-13	1.05e-12	19.9232
EYA2	-2.00263	-0.921837	-7.63803	1.47e-13	1.05e-12	19.923
SRGN	-1.27136	4.58299	-7.63443	1.51e-13	1.07e-12	19.8988
ANXA3	-2.03778	-0.151625	-7.63251	1.53e-13	1.09e-12	19.8859
FCGR3A	-1.55785	4.27277	-7.63219	1.53e-13	1.09e-12	19.8838
ADI1	-1.24818	8.37966	-7.62521	1.6e-13	1.14e-12	19.8371
IRF4	-2.0817	-0.569933	-7.6245	1.61e-13	1.15e-12	19.8323
SPTBN2	-1.98661	4.26148	-7.62088	1.65e-13	1.17e-12	19.8081
ALG1L	2.44882	1.17286	7.61808	1.68e-13	1.2e-12	19.7894
PTMS	-1.05122	8.81494	-7.61562	1.71e-13	1.21e-12	19.7729
STXBP6	1.36631	2.9761	7.61205	1.75e-13	1.24e-12	19.749
TTC39A	2.21845	2.00148	7.61198	1.75e-13	1.24e-12	19.7486
SPATA18	-2.29533	0.955031	-7.61029	1.78e-13	1.26e-12	19.7373
CHML	1.35189	3.06742	7.60996	1.78e-13	1.26e-12	19.7351
CCL2	-1.77591	2.99666	-7.60717	1.81e-13	1.28e-12	19.7164
FOXP2	-2.80207	-0.0818318	-7.6045	1.85e-13	1.3e-12	19.6986
COMT	-1.10555	6.80128	-7.60425	1.85e-13	1.3e-12	19.6969
CYP2A7	-4.26585	2.23127	-7.59857	1.92e-13	1.35e-12	19.659
GADD45G	-1.82137	5.39364	-7.59052	2.03e-13	1.43e-12	19.6052
LILRB1	-1.40549	1.27468	-7.58904	2.05e-13	1.44e-12	19.5954
GGT6	-2.42155	-1.77641	-7.58717	2.08e-13	1.46e-12	19.5829
WDR97	1.30402	0.406401	7.58586	2.1e-13	1.47e-12	19.5741
CNGA1	-2.24847	2.63152	-7.58241	2.15e-13	1.5e-12	19.5511
ARHGEF26	-1.61057	4.10496	-7.58093	2.17e-13	1.52e-12	19.5413
DNAH6	-2.21969	0.58786	-7.57675	2.23e-13	1.56e-12	19.5134
PHPT1	1.00414	5.80312	7.5755	2.25e-13	1.57e-12	19.5051
ATF5	-2.39416	8.03395	-7.57476	2.26e-13	1.58e-12	19.5002
TMIGD3	-1.46428	0.911457	-7.57459	2.26e-13	1.58e-12	19.499
IGF1	-2.21172	2.01937	-7.57397	2.27e-13	1.58e-12	19.4949
TKFC	-1.50592	6.72658	-7.57237	2.3e-13	1.6e-12	19.4843
MYO16	-1.70609	0.710645	-7.57187	2.31e-13	1.6e-12	19.481
AKR7A3	-2.62987	5.04693	-7.57158	2.31e-13	1.61e-12	19.479
JPT1	1.04298	5.08681	7.57157	2.31e-13	1.61e-12	19.4789
KLF4	-1.62307	2.79046	-7.55565	2.57e-13	1.78e-12	19.373
SLC27A2	-2.01203	6.57632	-7.55109	2.65e-13	1.83e-12	19.3427
GNMT	-2.8526	4.82592	-7.54787	2.71e-13	1.87e-12	19.3213
IL1R1	-1.01067	6.09577	-7.53994	2.86e-13	1.97e-12	19.2687
GABRE	2.14556	2.92805	7.5308	3.04e-13	2.08e-12	19.208
HADH	-1.02356	6.58852	-7.52699	3.12e-13	2.13e-12	19.1828
POU5F1	1.51308	0.193405	7.52622	3.14e-13	2.14e-12	19.1776
HEY2	-1.32547	2.01887	-7.52576	3.15e-13	2.14e-12	19.1746
METTL7A	-1.17378	8.786	-7.52132	3.25e-13	2.21e-12	19.1452
TRIM7	1.57612	-0.683748	7.52112	3.25e-13	2.21e-12	19.1439
PLG	-2.46627	9.61555	-7.5209	3.25e-13	2.21e-12	19.1424
SLC38A4	-2.16828	7.41513	-7.52074	3.26e-13	2.21e-12	19.1413
FTCDNL1	-1.06955	1.84176	-7.51885	3.3e-13	2.23e-12	19.1288
MT1A	-2.6968	1.92447	-7.51628	3.36e-13	2.27e-12	19.1118
PITX1	3.24386	-0.447802	7.5144	3.4e-13	2.3e-12	19.0994
HIST1H4H	1.72604	-0.788433	7.51316	3.43e-13	2.32e-12	19.0911
CES5A	-2.25609	0.170783	-7.5127	3.44e-13	2.32e-12	19.0881
GATM	-1.65927	9.36622	-7.50836	3.54e-13	2.39e-12	19.0594
OLFM1	-1.96125	0.450154	-7.50761	3.56e-13	2.4e-12	19.0544
NRM	1.16079	3.14277	7.50425	3.64e-13	2.45e-12	19.0322
FAT4	-1.80862	1.95065	-7.50364	3.66e-13	2.46e-12	19.0282
SPP2	-3.31224	4.93209	-7.50345	3.66e-13	2.47e-12	19.0269
ANG	-1.88496	8.06409	-7.50164	3.71e-13	2.49e-12	19.0149
ENPP1	-1.1166	5.75181	-7.50151	3.71e-13	2.49e-12	19.0141
ADCY1	-2.61626	2.33668	-7.49862	3.78e-13	2.54e-12	18.995
DAPK2	1.32291	2.94097	7.49524	3.87e-13	2.59e-12	18.9726
MYO10	-1.54323	3.0544	-7.49523	3.87e-13	2.59e-12	18.9725
ATP8B4	-1.07551	1.0861	-7.49073	3.99e-13	2.67e-12	18.9428
FGD1	1.09514	2.39126	7.48985	4.01e-13	2.68e-12	18.937
TSPAN12	-1.36521	3.70174	-7.48571	4.13e-13	2.76e-12	18.9097
LDLRAD1	2.64361	-0.653059	7.48339	4.19e-13	2.8e-12	18.8944
GOT1	-1.37013	7.76425	-7.47623	4.4e-13	2.93e-12	18.8471
TRIM16	1.85042	2.692	7.47104	4.55e-13	3.03e-12	18.8129
PHYH	-1.27803	7.74041	-7.46979	4.59e-13	3.06e-12	18.8047
PIMREG	1.88867	-0.596892	7.4697	4.6e-13	3.06e-12	18.8041
2021-03-02	-1.11063	6.36359	-7.46846	4.63e-13	3.08e-12	18.7959
CRYBG1	-1.4106	3.42866	-7.45926	4.93e-13	3.27e-12	18.7353
PHYHD1	-2.37678	3.29578	-7.45657	5.02e-13	3.33e-12	18.7176
GATA3	-1.57371	-0.168079	-7.45627	5.03e-13	3.33e-12	18.7156
GJB2	-1.52908	4.3074	-7.45531	5.06e-13	3.35e-12	18.7093
SAMD12	-2.22355	0.187587	-7.43913	5.64e-13	3.72e-12	18.6029
ENPEP	-1.51247	4.91767	-7.43508	5.8e-13	3.81e-12	18.5763
GAS1	-1.83913	-0.263851	-7.43145	5.94e-13	3.9e-12	18.5525
TMEM132A	1.70495	2.3721	7.43137	5.94e-13	3.9e-12	18.552
TSACC	1.21609	-0.147935	7.42988	6e-13	3.94e-12	18.5422
HERC5	-1.59086	2.60109	-7.42943	6.02e-13	3.95e-12	18.5393
SLC30A1	-1.11191	6.41182	-7.42657	6.14e-13	4.02e-12	18.5205
GREM2	-3.39067	2.03343	-7.42437	6.23e-13	4.08e-12	18.5061
DPYD	-1.31652	5.18801	-7.42319	6.28e-13	4.1e-12	18.4983
SLC4A4	-2.17124	3.90238	-7.41784	6.5e-13	4.25e-12	18.4632
FGD4	-1.15398	3.98367	-7.41666	6.56e-13	4.28e-12	18.4555
SMARCA2	-1.04965	5.48976	-7.40619	7.03e-13	4.57e-12	18.3869
TMEM150B	1.9917	2.22688	7.40524	7.08e-13	4.6e-12	18.3807
GRAMD1A	1.13993	4.93872	7.40192	7.23e-13	4.69e-12	18.3589
PDGFC	-1.15345	3.41704	-7.39934	7.36e-13	4.77e-12	18.342
PRSS22	-2.36401	-2.00747	-7.39657	7.5e-13	4.85e-12	18.324
OGDHL	-2.42098	5.61487	-7.39513	7.57e-13	4.9e-12	18.3145
ESPL1	1.63487	2.58601	7.38784	7.95e-13	5.12e-12	18.2669
ACADL	-2.79363	2.15535	-7.38578	8.06e-13	5.19e-12	18.2534
HAS2	-2.08625	-1.2833	-7.38287	8.21e-13	5.29e-12	18.2344
TRPM8	-2.47531	3.41878	-7.38207	8.26e-13	5.31e-12	18.2292
CPXM1	1.8259	0.428896	7.38081	8.33e-13	5.35e-12	18.221
ABHD15	-1.23192	4.36035	-7.37909	8.42e-13	5.41e-12	18.2098
MT1B	-2.10544	-3.26973	-7.37419	8.7e-13	5.58e-12	18.1778
CYB5A	-1.25435	8.42487	-7.37301	8.77e-13	5.62e-12	18.17
SOX6	-2.00678	2.16328	-7.37246	8.8e-13	5.64e-12	18.1665
CYP2A6	-4.39895	6.62938	-7.3721	8.82e-13	5.65e-12	18.1641
ANXA2	1.0777	7.83595	7.37018	8.94e-13	5.71e-12	18.1516
SPINK5	2.00292	-0.659309	7.36828	9.05e-13	5.78e-12	18.1392
ACTG2	1.63385	1.6868	7.36671	9.15e-13	5.84e-12	18.129
SLC3A1	-3.01072	0.843943	-7.36295	9.38e-13	5.97e-12	18.1045
CASS4	-1.19959	0.373521	-7.36215	9.43e-13	6e-12	18.0993
GCHFR	-1.18066	3.7309	-7.35828	9.67e-13	6.15e-12	18.074
TRIM71	3.5642	-0.656517	7.35778	9.71e-13	6.17e-12	18.0707
SLC5A3	-1.12701	3.25927	-7.35753	9.72e-13	6.18e-12	18.0691
CMTM4	1.09409	3.07198	7.35691	9.76e-13	6.2e-12	18.0651
FGB	-2.32255	12.0294	-7.35057	1.02e-12	6.46e-12	18.0238
VNN1	-2.89681	5.59123	-7.34595	1.05e-12	6.65e-12	17.9937
MEX3A	1.36738	1.8191	7.34089	1.09e-12	6.87e-12	17.9608
CCT6B	-1.32073	0.512409	-7.34018	1.09e-12	6.9e-12	17.9562
PTPRB	-1.25414	3.7794	-7.33961	1.1e-12	6.92e-12	17.9525
SORD	-1.52271	7.1125	-7.33958	1.1e-12	6.92e-12	17.9523
TMEM25	-1.7379	2.25817	-7.33918	1.1e-12	6.94e-12	17.9497
KLF9	-1.3514	6.25143	-7.33677	1.12e-12	7.04e-12	17.9341
ISX	3.43569	-0.475135	7.33205	1.15e-12	7.25e-12	17.9034
KLHL31	1.12077	-0.33521	7.33139	1.16e-12	7.28e-12	17.8991
MPPED1	-2.67209	2.00627	-7.32976	1.17e-12	7.36e-12	17.8885
ITPKA	1.87739	1.97475	7.32893	1.18e-12	7.4e-12	17.8831
ACAN	2.14481	-0.868981	7.32832	1.18e-12	7.42e-12	17.8792
HOXA10	2.7364	-1.0316	7.32508	1.21e-12	7.58e-12	17.8581
ZNF296	1.48937	-0.463914	7.31818	1.26e-12	7.92e-12	17.8133
ADH1C	-3.31552	7.31526	-7.31797	1.26e-12	7.92e-12	17.812
UGT2B10	-2.74867	6.50083	-7.31745	1.27e-12	7.95e-12	17.8086
NAP1L5	-1.26665	1.33452	-7.31733	1.27e-12	7.95e-12	17.8078
DNAH17	1.1087	-0.0962022	7.31362	1.3e-12	8.14e-12	17.7838
CYP4F2	-2.63529	5.69504	-7.31168	1.32e-12	8.24e-12	17.7712
SLCO2B1	-1.44989	7.25975	-7.30571	1.37e-12	8.56e-12	17.7325
CD69	-1.62663	0.590705	-7.30226	1.4e-12	8.75e-12	17.7102
KCNJ5	1.59497	1.21608	7.29541	1.47e-12	9.13e-12	17.6658
GSPT2	-2.21914	1.84119	-7.29162	1.5e-12	9.35e-12	17.6413
GADD45A	-1.17799	5.62828	-7.28319	1.59e-12	9.85e-12	17.5868
C9orf72	-1.051	2.72764	-7.27671	1.66e-12	1.03e-11	17.5449
PLGLB1	-1.74201	0.713134	-7.27613	1.67e-12	1.03e-11	17.5412
PLA2G16	-1.41795	5.28128	-7.2754	1.67e-12	1.03e-11	17.5365
CYP8B1	-3.69556	6.42528	-7.2742	1.69e-12	1.04e-11	17.5287
VASH2	1.6917	0.129565	7.25946	1.86e-12	1.14e-11	17.4336
ABI3BP	-1.85078	1.14506	-7.258	1.88e-12	1.15e-11	17.4242
HERC3	-1.0071	3.20904	-7.25797	1.88e-12	1.15e-11	17.424
SLC10A1	-3.44033	5.4581	-7.25756	1.88e-12	1.16e-11	17.4214
ARHGAP22	1.25177	0.169631	7.25604	1.9e-12	1.17e-11	17.4116
PDE6G	-1.19234	-0.312829	-7.2533	1.94e-12	1.18e-11	17.3939
FGR	-1.10479	1.89518	-7.24868	2e-12	1.22e-11	17.3641
LDB2	-1.12422	3.16012	-7.24723	2.01e-12	1.23e-11	17.3549
RNF157	1.87557	2.92308	7.24547	2.04e-12	1.24e-11	17.3435
AOX1	-2.48888	8.50488	-7.23506	2.18e-12	1.33e-11	17.2765
RHPN1	1.33795	2.02853	7.23165	2.23e-12	1.36e-11	17.2546
C5AR1	-1.17069	2.60889	-7.21718	2.45e-12	1.49e-11	17.1617
CYP2J2	-1.62545	5.75113	-7.21375	2.51e-12	1.52e-11	17.1397
XDH	-2.19483	5.04191	-7.21127	2.55e-12	1.55e-11	17.1238
RELL2	1.09737	-0.0794325	7.21051	2.56e-12	1.55e-11	17.1189
IFITM1	-1.60322	4.55039	-7.20987	2.57e-12	1.56e-11	17.1148
CYP2E1	-4.28487	8.85369	-7.20634	2.63e-12	1.59e-11	17.0921
TMEM200C	-1.68392	-0.959911	-7.20376	2.68e-12	1.62e-11	17.0756
KCP	1.58643	-0.899224	7.19269	2.88e-12	1.73e-11	17.0047
FSD1L	1.01955	0.624277	7.18794	2.97e-12	1.79e-11	16.9744
ARHGAP15	-1.11738	1.88132	-7.18761	2.98e-12	1.79e-11	16.9722
CLU	-1.23582	11.67	-7.18612	3.01e-12	1.81e-11	16.9627
GBP1	-1.25795	5.21366	-7.18361	3.06e-12	1.83e-11	16.9467
FCGR3B	-1.94233	-1.07982	-7.18286	3.07e-12	1.84e-11	16.9418
ALDOB	-2.73769	10.7742	-7.17714	3.19e-12	1.91e-11	16.9053
PROM2	-2.03826	-1.32672	-7.17637	3.2e-12	1.92e-11	16.9004
TNFRSF11B	-2.26033	1.69257	-7.17015	3.34e-12	2e-11	16.8606
F11	-1.74104	5.40745	-7.1701	3.34e-12	2e-11	16.8603
ANO1	-2.18794	4.89093	-7.16627	3.42e-12	2.05e-11	16.8359
TTPAL	-1.04641	4.63199	-7.16193	3.52e-12	2.1e-11	16.8082
RHBDL1	1.26902	0.593494	7.15075	3.79e-12	2.26e-11	16.7369
CSAD	-1.21112	4.50996	-7.1476	3.86e-12	2.3e-11	16.7169
DPEP2	-1.02957	0.48562	-7.13936	4.08e-12	2.43e-11	16.6644
LRRC1	1.93139	2.2831	7.13847	4.1e-12	2.44e-11	16.6587
ARAP2	-1.09263	2.76665	-7.13639	4.16e-12	2.47e-11	16.6455
CRIP3	1.58685	2.07176	7.13446	4.21e-12	2.5e-11	16.6333
SLC1A1	-2.40579	4.20543	-7.13151	4.29e-12	2.54e-11	16.6145
TMCO3	1.01693	4.80832	7.12954	4.34e-12	2.57e-11	16.602
HRCT1	2.06481	1.58553	7.12848	4.37e-12	2.59e-11	16.5952
MT-ND4L	-1.47274	9.04016	-7.12488	4.48e-12	2.64e-11	16.5724
SLC31A2	-1.19284	-0.152126	-7.12061	4.6e-12	2.71e-11	16.5452
BEND3	1.00539	1.41446	7.11488	4.78e-12	2.81e-11	16.5088
INHBC	-2.12355	4.67246	-7.1135	4.82e-12	2.83e-11	16.5001
SEMA6C	1.19853	3.62088	7.10848	4.98e-12	2.92e-11	16.4682
HAO1	-2.17603	6.85716	-7.10747	5.01e-12	2.94e-11	16.4618
TNFSF11	-2.0045	-0.726213	-7.10218	5.19e-12	3.03e-11	16.4283
BASP1	-1.77248	2.0386	-7.09746	5.35e-12	3.13e-11	16.3984
TTR	-2.5234	10.0712	-7.09372	5.48e-12	3.2e-11	16.3747
SGK1	-1.39731	5.42018	-7.08738	5.71e-12	3.32e-11	16.3346
ACOX2	-1.59769	6.22966	-7.08612	5.76e-12	3.35e-11	16.3266
PID1	-1.16365	5.0411	-7.08404	5.83e-12	3.39e-11	16.3135
MAGEA1	3.6312	-0.682936	7.08126	5.94e-12	3.45e-11	16.2959
KIAA0040	-1.04797	3.96838	-7.0812	5.94e-12	3.45e-11	16.2955
CD274	-1.23399	0.509607	-7.07488	6.19e-12	3.58e-11	16.2556
ATAD3C	-1.98909	0.393335	-7.07478	6.19e-12	3.58e-11	16.255
CPLX2	4.32451	0.527553	7.07123	6.34e-12	3.66e-11	16.2325
IGSF3	1.88089	2.66214	7.06703	6.51e-12	3.76e-11	16.206
TGFA	-1.98419	1.22208	-7.06035	6.8e-12	3.92e-11	16.1638
PRNP	-1.31843	5.02357	-7.05978	6.82e-12	3.93e-11	16.1602
RUNDC3B	-1.70931	2.25106	-7.055	7.03e-12	4.05e-11	16.1301
RORA	-1.13796	4.68209	-7.05496	7.04e-12	4.05e-11	16.1299
PODN	-2.24633	1.91079	-7.04053	7.72e-12	4.41e-11	16.039
CCDC38	-1.40754	-0.34613	-7.03863	7.82e-12	4.46e-11	16.027
MPEG1	-1.19729	4.17329	-7.03709	7.89e-12	4.5e-11	16.0174
RARB	-1.23164	1.0207	-7.03278	8.11e-12	4.62e-11	15.9902
FCN1	-1.5329	1.0894	-7.03207	8.15e-12	4.64e-11	15.9857
MAFF	-1.18879	4.26281	-7.02775	8.38e-12	4.76e-11	15.9586
APOA5	-2.50245	6.889	-7.02567	8.49e-12	4.82e-11	15.9456
NR6A1	1.0191	2.23664	7.02327	8.63e-12	4.89e-11	15.9304
MYBL1	1.0324	1.48166	7.01762	8.94e-12	5.06e-11	15.895
DCXR	-1.74808	8.56977	-7.01244	9.25e-12	5.22e-11	15.8625
SOX12	1.13753	4.19056	7.01076	9.35e-12	5.28e-11	15.8519
SERPINA1	-1.43697	13.9418	-7.00984	9.4e-12	5.31e-11	15.8462
2021-09-03	1.75368	-0.762754	7.00862	9.48e-12	5.35e-11	15.8385
G0S2	-2.09034	5.22611	-7.00791	9.52e-12	5.37e-11	15.8341
CDK5R1	1.05811	0.549406	6.99875	1.01e-11	5.68e-11	15.7767
SLC39A8	-1.06178	4.64181	-6.99843	1.01e-11	5.68e-11	15.7747
TNFSF4	1.25688	1.03161	6.99558	1.03e-11	5.78e-11	15.7568
SLC34A2	-3.0412	-0.737442	-6.99369	1.04e-11	5.84e-11	15.745
MANEA	-1.05625	3.99586	-6.99049	1.06e-11	5.96e-11	15.7249
F3	-1.60645	0.798416	-6.98677	1.09e-11	6.09e-11	15.7017
CLEC3B	-1.54377	2.49938	-6.98506	1.1e-11	6.15e-11	15.691
GPRASP1	-1.06424	0.786607	-6.98173	1.13e-11	6.28e-11	15.6701
CISH	-1.19959	4.69893	-6.98068	1.13e-11	6.32e-11	15.6636
HEPACAM	-3.41679	-0.558605	-6.98003	1.14e-11	6.34e-11	15.6596
SLC6A12	-2.00625	4.83537	-6.97999	1.14e-11	6.34e-11	15.6593
EML6	1.42429	0.573323	6.97561	1.17e-11	6.51e-11	15.6319
SC5D	-1.21379	6.3954	-6.97501	1.17e-11	6.53e-11	15.6282
AGPAT2	-1.21535	6.67219	-6.97466	1.18e-11	6.55e-11	15.626
USH2A	-2.12035	2.00147	-6.97422	1.18e-11	6.56e-11	15.6232
PAFAH1B3	1.41138	3.26672	6.97358	1.19e-11	6.59e-11	15.6192
EPB41L4A	-1.51179	0.505155	-6.97141	1.2e-11	6.67e-11	15.6057
F2RL3	1.77715	0.842065	6.96642	1.24e-11	6.89e-11	15.5745
ELFN2	2.74616	0.679285	6.9629	1.27e-11	7.03e-11	15.5526
GC	-1.61994	10.9437	-6.96285	1.27e-11	7.03e-11	15.5522
MMS22L	1.06509	1.58018	6.96082	1.29e-11	7.12e-11	15.5396
BRIP1	1.20136	1.6725	6.95933	1.3e-11	7.18e-11	15.5303
NUGGC	-2.18357	3.00488	-6.95443	1.34e-11	7.41e-11	15.4998
FNDC4	-1.5792	5.00477	-6.95429	1.34e-11	7.41e-11	15.4989
KCNMA1	-1.56243	2.3158	-6.95408	1.34e-11	7.42e-11	15.4976
TBXAS1	-1.06858	2.43698	-6.94962	1.38e-11	7.63e-11	15.4698
ARSF	-2.61694	-1.20832	-6.94844	1.39e-11	7.68e-11	15.4624
2021-09-05	1.45098	2.08223	6.94265	1.44e-11	7.95e-11	15.4264
ADM	-1.22909	3.74328	-6.9397	1.47e-11	8.08e-11	15.408
LEAP2	-1.80037	6.04236	-6.93765	1.49e-11	8.18e-11	15.3953
VWF	1.39263	5.57563	6.93592	1.51e-11	8.26e-11	15.3845
GPR180	-1.28661	2.94187	-6.93091	1.56e-11	8.51e-11	15.3534
CRYL1	-1.12649	6.80245	-6.93066	1.56e-11	8.52e-11	15.3518
GALNT16	-1.55819	0.682167	-6.92453	1.62e-11	8.86e-11	15.3137
CSMD2	1.85684	-0.728812	6.91748	1.69e-11	9.25e-11	15.27
SERPINF2	-1.78117	9.68304	-6.91741	1.69e-11	9.25e-11	15.2695
TAT	-3.24962	7.99033	-6.91671	1.7e-11	9.28e-11	15.2652
PDE1C	1.33971	-1.31721	6.9155	1.72e-11	9.35e-11	15.2577
REPS2	-1.07665	3.59715	-6.90807	1.8e-11	9.78e-11	15.2116
AQP4	-2.02044	-0.916434	-6.9048	1.84e-11	9.98e-11	15.1913
CX3CR1	-1.15316	0.0139037	-6.89935	1.9e-11	1.03e-10	15.1575
FGG	-2.02293	11.8978	-6.89607	1.94e-11	1.05e-10	15.1373
PLXNC1	1.53428	3.17397	6.89595	1.94e-11	1.05e-10	15.1365
GCKR	-1.64605	5.09422	-6.89488	1.95e-11	1.06e-10	15.1299
ALDH5A1	-1.09404	6.64615	-6.89188	1.99e-11	1.08e-10	15.1113
NECTIN1	1.01106	3.60895	6.89056	2.01e-11	1.09e-10	15.1031
ADM2	1.69288	3.08132	6.88088	2.14e-11	1.15e-10	15.0433
HSD11B1	-3.19068	6.28863	-6.88072	2.14e-11	1.15e-10	15.0423
GINS4	1.29828	0.769934	6.87986	2.15e-11	1.16e-10	15.037
HMGN5	-1.64833	1.59694	-6.87785	2.18e-11	1.17e-10	15.0245
UNC5C	-1.33752	0.00862071	-6.8698	2.29e-11	1.23e-10	14.9749
SIX2	1.94772	-2.1649	6.8698	2.29e-11	1.23e-10	14.9749
BCAT1	1.2483	1.81543	6.86918	2.3e-11	1.23e-10	14.971
WNT11	-2.11709	0.872212	-6.86521	2.36e-11	1.26e-10	14.9466
CNTFR	-2.91954	0.59515	-6.86227	2.4e-11	1.29e-10	14.9284
ENTPD5	-1.23779	7.21526	-6.85889	2.45e-11	1.31e-10	14.9076
FILIP1L	-1.17251	3.24575	-6.85862	2.46e-11	1.31e-10	14.9059
CTH	-2.06202	4.97962	-6.85502	2.51e-11	1.34e-10	14.8838
ADGRL2	-1.15723	4.94337	-6.85362	2.54e-11	1.35e-10	14.8751
NCOA7	-1.09006	4.81012	-6.8531	2.54e-11	1.36e-10	14.8719
CDC14B	-1.17031	4.63573	-6.85028	2.59e-11	1.38e-10	14.8546
ZMYND12	-1.49958	0.800628	-6.84862	2.62e-11	1.39e-10	14.8443
FGA	-1.98207	12.7808	-6.84705	2.64e-11	1.41e-10	14.8346
LGSN	-2.19233	-0.31217	-6.84632	2.66e-11	1.41e-10	14.8302
CRISPLD2	-1.67904	3.24815	-6.84612	2.66e-11	1.41e-10	14.829
GBP7	-2.55905	3.4715	-6.8445	2.69e-11	1.43e-10	14.8189
TM6SF2	-1.76615	3.19703	-6.84265	2.72e-11	1.44e-10	14.8076
PLEKHH1	1.12681	1.53228	6.84219	2.73e-11	1.45e-10	14.8048
CDCA7	2.22141	0.00166895	6.83434	2.86e-11	1.52e-10	14.7565
PRG4	-2.64822	5.88132	-6.8343	2.86e-11	1.52e-10	14.7562
MYO15B	1.13474	5.09845	6.83356	2.88e-11	1.52e-10	14.7516
NANOS1	1.61494	-0.523676	6.8335	2.88e-11	1.52e-10	14.7513
MT-ATP8	-1.32622	8.58968	-6.8334	2.88e-11	1.52e-10	14.7507
SULT1C2	2.84838	1.93433	6.8324	2.9e-11	1.53e-10	14.7445
C2orf88	-1.32623	0.806033	-6.8303	2.94e-11	1.55e-10	14.7316
COCH	2.54361	0.339735	6.81961	3.14e-11	1.65e-10	14.666
BARD1	1.01912	1.40107	6.8181	3.17e-11	1.67e-10	14.6568
PC	-1.26554	7.50501	-6.8164	3.2e-11	1.68e-10	14.6463
RBM24	1.78393	1.32834	6.81522	3.23e-11	1.69e-10	14.6391
FRMD6	-1.19417	2.83424	-6.81389	3.26e-11	1.71e-10	14.6309
MICU3	-1.41337	1.5653	-6.81219	3.29e-11	1.72e-10	14.6205
GATA6	-1.07808	3.52821	-6.81135	3.31e-11	1.73e-10	14.6154
GNAL	1.47918	1.58951	6.8093	3.35e-11	1.75e-10	14.6028
LILRB2	-1.11198	1.97031	-6.80765	3.39e-11	1.77e-10	14.5927
IGFBP1	-2.34929	8.35917	-6.80729	3.39e-11	1.77e-10	14.5905
SULT1B1	-2.16514	3.01344	-6.80153	3.52e-11	1.84e-10	14.5552
ART4	-1.85614	3.58094	-6.79702	3.62e-11	1.88e-10	14.5276
CABYR	2.34052	0.310048	6.79593	3.64e-11	1.9e-10	14.5209
PLSCR1	-1.00298	4.41708	-6.7952	3.66e-11	1.9e-10	14.5164
C1QC	-1.32171	5.94566	-6.78173	3.98e-11	2.06e-10	14.4341
FLRT2	-1.95715	0.675255	-6.77972	4.03e-11	2.09e-10	14.4218
REEP2	1.58083	-1.07923	6.7763	4.12e-11	2.13e-10	14.401
A2M	-1.67563	10.6655	-6.77407	4.18e-11	2.16e-10	14.3873
TNFSF13	-1.01276	1.16908	-6.7689	4.31e-11	2.23e-10	14.3558
SPAG5	1.08318	4.26707	6.76583	4.4e-11	2.27e-10	14.3371
PNMA2	-1.63919	-0.850411	-6.76461	4.43e-11	2.28e-10	14.3297
BCAS4	1.26116	1.41585	6.76383	4.45e-11	2.29e-10	14.3249
LTBP4	-1.45066	4.5832	-6.75083	4.83e-11	2.48e-10	14.2457
ITGB8	-2.32951	-0.682976	-6.75041	4.84e-11	2.48e-10	14.2432
HHIPL2	2.4529	-1.22826	6.74536	5e-11	2.56e-10	14.2125
C4orf19	-1.09572	3.6167	-6.74525	5e-11	2.56e-10	14.2118
HSD17B6	-2.27149	7.88816	-6.7401	5.16e-11	2.64e-10	14.1804
KHK	-1.45402	7.17493	-6.73558	5.31e-11	2.71e-10	14.153
TMPRSS2	-1.44164	4.75091	-6.73217	5.42e-11	2.76e-10	14.1323
PER1	-1.01581	5.69919	-6.73108	5.46e-11	2.78e-10	14.1257
CSF1R	-1.21405	4.2817	-6.73067	5.47e-11	2.78e-10	14.1232
SULT1E1	-2.48162	1.42996	-6.7188	5.89e-11	2.98e-10	14.0512
SLC28A1	-2.51083	4.00096	-6.71373	6.08e-11	3.07e-10	14.0205
COX6A2	-2.40539	-0.666659	-6.71273	6.12e-11	3.09e-10	14.0144
CSF3R	-1.40036	1.76978	-6.71097	6.18e-11	3.13e-10	14.0037
LRRC37A3	1.03785	1.01353	6.70727	6.33e-11	3.19e-10	13.9813
UGT1A1	-2.63362	4.83507	-6.70694	6.34e-11	3.2e-10	13.9793
PIM1	-1.04346	4.93457	-6.70593	6.38e-11	3.22e-10	13.9732
EFHD1	-1.89673	3.22468	-6.70587	6.38e-11	3.22e-10	13.9728
ABRACL	-1.19455	3.06331	-6.70332	6.48e-11	3.27e-10	13.9574
HIST1H2BN	1.18336	0.502852	6.69724	6.73e-11	3.39e-10	13.9206
PIK3C2G	-2.28188	2.19851	-6.69697	6.74e-11	3.39e-10	13.919
IGF2	-3.84991	6.997	-6.69368	6.88e-11	3.46e-10	13.8991
RGN	-1.5339	6.70883	-6.68642	7.2e-11	3.61e-10	13.8552
SEC14L3	-2.06023	-1.13394	-6.68427	7.3e-11	3.65e-10	13.8423
COL7A1	2.00122	2.11795	6.68175	7.41e-11	3.7e-10	13.827
MAPK11	1.08349	2.49155	6.68168	7.41e-11	3.7e-10	13.8266
PTN	-1.57445	0.381301	-6.67791	7.59e-11	3.79e-10	13.8039
HPGD	-3.26949	4.3635	-6.67648	7.66e-11	3.82e-10	13.7952
SLC45A3	-1.23241	3.20663	-6.67528	7.71e-11	3.84e-10	13.788
P3H4	1.11161	3.09349	6.67062	7.94e-11	3.95e-10	13.7599
PLA2G5	-1.32495	0.747509	-6.66939	8e-11	3.98e-10	13.7525
SELENOP	-1.30073	8.97242	-6.66745	8.09e-11	4.02e-10	13.7408
CD109	1.67759	2.47533	6.66228	8.36e-11	4.15e-10	13.7096
GOLGA8A	1.49723	1.70712	6.66118	8.41e-11	4.17e-10	13.703
LIPG	-1.60377	4.68235	-6.65974	8.49e-11	4.21e-10	13.6944
C5	-1.23414	8.59421	-6.6588	8.54e-11	4.23e-10	13.6887
PRSS8	-3.2906	1.8406	-6.65781	8.59e-11	4.25e-10	13.6828
SLC39A10	1.00068	2.80682	6.65774	8.59e-11	4.26e-10	13.6823
SPATA6L	-1.05821	1.13487	-6.64737	9.16e-11	4.52e-10	13.62
EOMES	-1.4052	-0.543542	-6.64229	9.45e-11	4.66e-10	13.5894
EVA1A	-1.50634	5.22295	-6.63951	9.61e-11	4.73e-10	13.5728
SLC16A5	-1.08489	0.520293	-6.6381	9.7e-11	4.77e-10	13.5643
FUT2	1.79973	-0.232763	6.63695	9.77e-11	4.8e-10	13.5574
SERPINA10	-1.55839	7.48086	-6.63436	9.92e-11	4.87e-10	13.5419
EPO	-2.5831	-0.728021	-6.62788	1.03e-10	5.06e-10	13.503
TAGAP	-1.33342	0.634585	-6.62703	1.04e-10	5.08e-10	13.4979
C18orf54	1.05221	-0.0323237	6.62272	1.07e-10	5.21e-10	13.472
NR1I2	-2.51962	3.93905	-6.62214	1.07e-10	5.23e-10	13.4685
FETUB	-2.69516	5.15252	-6.62164	1.07e-10	5.24e-10	13.4656
UGT1A4	-3.18146	3.86467	-6.6159	1.11e-10	5.42e-10	13.4312
SOX5	-1.22942	2.67694	-6.61562	1.11e-10	5.43e-10	13.4295
SGCD	-1.89619	0.0574275	-6.61093	1.15e-10	5.58e-10	13.4014
PAQR6	1.23703	0.508947	6.60653	1.18e-10	5.72e-10	13.3752
EMILIN1	-1.5589	4.11599	-6.60436	1.19e-10	5.79e-10	13.3621
TPD52L1	-1.2696	4.1527	-6.60004	1.22e-10	5.94e-10	13.3363
CFHR3	-2.67043	5.22642	-6.59965	1.23e-10	5.95e-10	13.334
SLCO1B1	-2.06488	6.18279	-6.59206	1.29e-10	6.21e-10	13.2887
ECHDC2	-1.0147	7.10832	-6.58955	1.31e-10	6.3e-10	13.2737
FGL1	-2.10677	9.4831	-6.5894	1.31e-10	6.31e-10	13.2728
PDZRN3	-1.79149	-0.481968	-6.58826	1.32e-10	6.35e-10	13.266
AASS	-1.96624	3.158	-6.58738	1.32e-10	6.37e-10	13.2608
IPCEF1	-1.16357	-0.250195	-6.58579	1.34e-10	6.44e-10	13.2512
ACBD4	-1.03514	5.40417	-6.58558	1.34e-10	6.44e-10	13.25
FLRT3	-1.6085	2.90037	-6.5799	1.39e-10	6.66e-10	13.2161
SERTM2	-2.96736	-0.640613	-6.57793	1.4e-10	6.74e-10	13.2044
MYLK	-1.08679	5.88324	-6.57596	1.42e-10	6.81e-10	13.1927
TMEM266	1.28904	-0.349945	6.55615	1.6e-10	7.66e-10	13.0748
FXYD6	-1.05673	3.1857	-6.55472	1.61e-10	7.72e-10	13.0663
SLC25A25	-1.32446	5.80945	-6.5517	1.64e-10	7.86e-10	13.0483
A1BG	-2.13026	5.78475	-6.55076	1.65e-10	7.9e-10	13.0427
C1QB	-1.37397	6.21716	-6.54595	1.7e-10	8.12e-10	13.0142
LCP2	-1.02974	3.18677	-6.54306	1.73e-10	8.26e-10	12.997
LYPD8	2.20409	-1.65983	6.54103	1.75e-10	8.36e-10	12.985
C3	-1.26107	13.0667	-6.53676	1.8e-10	8.57e-10	12.9597
WNK4	2.32477	0.631702	6.53143	1.86e-10	8.84e-10	12.9281
PDE11A	-1.87154	1.56321	-6.52465	1.94e-10	9.19e-10	12.8879
DLG5	1.2138	3.26781	6.52404	1.95e-10	9.22e-10	12.8843
ALDH1A3	-1.81714	0.299737	-6.52093	1.98e-10	9.39e-10	12.8659
GALNT14	-1.33143	-0.771239	-6.51727	2.03e-10	9.58e-10	12.8443
MYC	-1.53222	5.07367	-6.51501	2.06e-10	9.71e-10	12.8309
SPOCK1	2.22405	-0.406364	6.50865	2.14e-10	1.01e-09	12.7933
FTCD	-2.18609	7.53097	-6.50791	2.15e-10	1.01e-09	12.789
PON1	-2.31949	7.33799	-6.50758	2.15e-10	1.01e-09	12.787
PTPRD	-2.22204	1.76449	-6.5064	2.17e-10	1.02e-09	12.78
PPP1R1C	-1.99872	0.527945	-6.50611	2.17e-10	1.02e-09	12.7783
KCNK6	-1.01765	2.07504	-6.50561	2.18e-10	1.02e-09	12.7753
MYCN	2.0341	-0.753929	6.50378	2.2e-10	1.03e-09	12.7645
PTPRN2	-1.12611	1.25391	-6.49868	2.27e-10	1.07e-09	12.7345
SLC51B	2.02629	1.40141	6.49822	2.27e-10	1.07e-09	12.7317
PTPRS	-2.13793	2.26427	-6.49725	2.29e-10	1.07e-09	12.726
AGMAT	-1.20749	5.71956	-6.4966	2.3e-10	1.08e-09	12.7222
CES3	-1.82986	4.37082	-6.49354	2.34e-10	1.1e-09	12.7042
CD180	-1.19975	0.616277	-6.48868	2.41e-10	1.13e-09	12.6755
SIGIRR	-1.15282	5.20645	-6.48408	2.48e-10	1.16e-09	12.6484
MUC13	3.41306	3.37074	6.48406	2.48e-10	1.16e-09	12.6482
ZNF462	-1.21338	0.266189	-6.48359	2.49e-10	1.16e-09	12.6455
MAPK12	1.44095	2.33404	6.48311	2.49e-10	1.16e-09	12.6427
ST6GAL1	-1.06373	9.07298	-6.48308	2.49e-10	1.16e-09	12.6425
MAOB	-1.13397	7.57474	-6.47955	2.55e-10	1.19e-09	12.6217
IL20RA	-2.13035	-2.09795	-6.47725	2.58e-10	1.2e-09	12.6082
RBP5	-1.67578	5.96438	-6.46959	2.7e-10	1.26e-09	12.5631
CYP2C18	-2.05808	4.75128	-6.46816	2.73e-10	1.27e-09	12.5547
MYO18B	2.54346	-1.47592	6.46809	2.73e-10	1.27e-09	12.5543
MST1	-1.4144	7.44898	-6.46141	2.84e-10	1.32e-09	12.5151
CEMIP	1.87149	0.840838	6.4585	2.89e-10	1.34e-09	12.498
PKHD1	-2.27354	1.13203	-6.45718	2.91e-10	1.35e-09	12.4902
PRICKLE1	-1.45227	-0.486643	-6.45236	3e-10	1.39e-09	12.4619
ACOT12	-2.0781	4.274	-6.44392	3.16e-10	1.46e-09	12.4124
GDPD3	1.07691	-0.0831262	6.44294	3.17e-10	1.47e-09	12.4067
LZTS1	1.10029	1.70421	6.43755	3.28e-10	1.51e-09	12.3751
DTNA	1.66973	3.18772	6.43582	3.31e-10	1.53e-09	12.365
NQO1	2.86686	4.28024	6.42914	3.45e-10	1.59e-09	12.326
FMO2	-1.63999	0.412234	-6.4283	3.47e-10	1.59e-09	12.321
OR2I1P	2.09769	4.43242	6.42589	3.52e-10	1.62e-09	12.3069
RBL2	-1.02426	5.03752	-6.42283	3.58e-10	1.64e-09	12.289
SCD5	-1.60124	0.7476	-6.42065	3.63e-10	1.66e-09	12.2763
TLX1	1.86383	0.499939	6.41683	3.71e-10	1.7e-09	12.254
ADAMTSL3	-1.70825	3.05623	-6.41055	3.85e-10	1.76e-09	12.2174
LPAR1	-1.79908	-0.366644	-6.40974	3.87e-10	1.77e-09	12.2126
ENTPD8	-1.6185	2.76135	-6.39991	4.11e-10	1.87e-09	12.1553
FBLN5	-1.61966	3.82633	-6.38086	4.6e-10	2.09e-09	12.0445
GPR158	2.2297	0.107125	6.3791	4.65e-10	2.11e-09	12.0342
AR	-2.04934	5.50007	-6.37688	4.71e-10	2.14e-09	12.0213
NT5E	-1.21507	5.14255	-6.3738	4.8e-10	2.18e-09	12.0034
ASPN	-1.58535	3.11354	-6.364	5.09e-10	2.3e-09	11.9466
FMO3	-2.03648	7.55419	-6.35575	5.34e-10	2.41e-09	11.8987
SLC39A5	-2.44198	5.58807	-6.35368	5.41e-10	2.44e-09	11.8867
ITGAD	-1.51628	-0.481714	-6.35251	5.45e-10	2.46e-09	11.8799
NXPE3	-1.09343	1.34515	-6.35095	5.5e-10	2.48e-09	11.8709
THEMIS2	-1.10596	2.91181	-6.35058	5.51e-10	2.48e-09	11.8688
GPSM1	1.5056	2.7759	6.34948	5.55e-10	2.5e-09	11.8624
HDAC9	-1.16047	0.283851	-6.34846	5.58e-10	2.51e-09	11.8565
LRRC25	-1.05642	1.99443	-6.34448	5.71e-10	2.57e-09	11.8335
FHL2	-1.31239	2.92669	-6.34299	5.76e-10	2.59e-09	11.8248
TLR2	-1.42226	1.93698	-6.34264	5.78e-10	2.6e-09	11.8228
DBNDD1	1.41301	4.16381	6.34247	5.78e-10	2.6e-09	11.8219
ADRB2	-1.57452	2.1176	-6.3422	5.79e-10	2.6e-09	11.8203
RAPGEF4	-1.00044	3.84384	-6.33926	5.89e-10	2.65e-09	11.8033
FAP	1.75098	-0.0843575	6.33657	5.99e-10	2.69e-09	11.7877
KIAA1211L	1.02303	0.74916	6.33455	6.06e-10	2.72e-09	11.7761
PFKFB4	1.14388	1.25158	6.33152	6.17e-10	2.76e-09	11.7585
DUOX1	1.33777	0.726074	6.32856	6.28e-10	2.81e-09	11.7415
MGLL	-1.1869	6.54718	-6.32639	6.36e-10	2.84e-09	11.729
SAMSN1	-1.23707	1.10917	-6.32317	6.48e-10	2.89e-09	11.7104
CHRNE	-1.10706	0.523073	-6.32228	6.52e-10	2.91e-09	11.7052
SERPINI1	1.19463	1.8495	6.3196	6.62e-10	2.95e-09	11.6898
MICB	1.08679	1.5627	6.31175	6.93e-10	3.08e-09	11.6446
PI15	2.0362	-1.11032	6.31007	7e-10	3.11e-09	11.6349
MACROD1	-1.10013	4.27536	-6.30823	7.08e-10	3.14e-09	11.6242
ABCA9	-1.46684	1.96179	-6.30574	7.19e-10	3.19e-09	11.6099
PLA2G4A	-1.31374	-0.821861	-6.30072	7.4e-10	3.28e-09	11.5811
SFRP4	1.90986	0.638493	6.29883	7.48e-10	3.31e-09	11.5702
HSD17B2	-1.62718	6.14575	-6.2973	7.55e-10	3.34e-09	11.5614
OSR2	1.95525	-1.29211	6.29463	7.67e-10	3.39e-09	11.546
ASIC1	1.86063	-0.0666834	6.2899	7.89e-10	3.48e-09	11.5188
RAMP3	-1.32647	3.22211	-6.2862	8.06e-10	3.56e-09	11.4976
ABCG2	-1.66316	3.85773	-6.28592	8.08e-10	3.56e-09	11.496
IGF2BP3	2.34189	-0.594093	6.28395	8.17e-10	3.6e-09	11.4847
FAM81A	1.30951	-0.793349	6.28187	8.27e-10	3.65e-09	11.4728
APCS	-2.14996	8.77665	-6.2811	8.31e-10	3.66e-09	11.4683
AL049839.2	-1.41993	2.45394	-6.26682	9.04e-10	3.97e-09	11.3865
APOA1	-2.40194	11.8398	-6.26474	9.15e-10	4.01e-09	11.3746
PSD3	-1.16278	4.36858	-6.2622	9.29e-10	4.07e-09	11.36
CNTN1	-2.2407	-2.07554	-6.26121	9.34e-10	4.09e-09	11.3544
LY6G5B	1.13729	-0.367628	6.25644	9.6e-10	4.2e-09	11.3271
POU2F2	-1.07565	0.770875	-6.25644	9.61e-10	4.2e-09	11.3271
BMP6	-1.48192	-0.209697	-6.25313	9.79e-10	4.27e-09	11.3082
TPRG1	-1.3268	1.32299	-6.25071	9.93e-10	4.33e-09	11.2944
CYP1A1	-3.26452	2.14304	-6.24954	1e-09	4.36e-09	11.2877
SIGLEC14	-1.75494	-0.834235	-6.24773	1.01e-09	4.41e-09	11.2773
ESRRG	-1.99753	-1.27039	-6.24721	1.01e-09	4.42e-09	11.2743
ENC1	-1.08697	4.19618	-6.24698	1.02e-09	4.42e-09	11.273
TTPA	-1.77491	4.95331	-6.23658	1.08e-09	4.69e-09	11.2136
WISP2	-1.97933	-0.691027	-6.23605	1.08e-09	4.7e-09	11.2106
SLC6A13	-1.80249	2.01657	-6.23602	1.08e-09	4.7e-09	11.2105
PLXNA4	-1.84691	-1.27036	-6.23566	1.08e-09	4.7e-09	11.2084
CPB2	-1.49476	8.55598	-6.23146	1.11e-09	4.81e-09	11.1845
CYP4X1	-1.3598	1.25072	-6.22851	1.13e-09	4.89e-09	11.1677
LIPC	-1.53246	6.2101	-6.2268	1.14e-09	4.93e-09	11.1579
FAM171A2	1.28104	-0.463315	6.22667	1.14e-09	4.94e-09	11.1572
MTMR11	1.40779	2.6988	6.22624	1.15e-09	4.95e-09	11.1547
HCK	-1.08685	2.62021	-6.22267	1.17e-09	5.04e-09	11.1344
MACC1	-1.77	-1.24353	-6.22131	1.18e-09	5.08e-09	11.1267
CEBPD	-1.09895	6.37678	-6.21832	1.2e-09	5.17e-09	11.1096
CTXND1	-1.71728	3.5018	-6.21425	1.23e-09	5.29e-09	11.0865
NECTIN3	-1.24372	3.55205	-6.21357	1.23e-09	5.31e-09	11.0826
RASD1	-1.80736	4.51469	-6.20986	1.26e-09	5.41e-09	11.0615
TUSC1	-1.25742	2.42556	-6.20618	1.29e-09	5.53e-09	11.0407
KYNU	-1.41631	4.68595	-6.20577	1.29e-09	5.54e-09	11.0383
CMBL	-1.48074	6.78826	-6.20355	1.31e-09	5.6e-09	11.0257
GPRC5A	-1.76943	-0.886397	-6.20266	1.32e-09	5.63e-09	11.0206
FAM110C	-2.02423	3.11306	-6.20155	1.32e-09	5.66e-09	11.0143
TKT	1.08356	7.56857	6.201	1.33e-09	5.68e-09	11.0112
RGS5	1.15715	5.98182	6.19554	1.37e-09	5.85e-09	10.9802
SOWAHB	-1.3321	3.19945	-6.19461	1.38e-09	5.88e-09	10.9749
HCN2	1.68318	-0.772144	6.19142	1.4e-09	5.99e-09	10.9569
PLD1	-1.08434	4.42231	-6.1905	1.41e-09	6.02e-09	10.9517
MYO1A	1.80233	0.150085	6.19033	1.41e-09	6.02e-09	10.9507
SULT1A2	-1.6191	3.2841	-6.18859	1.43e-09	6.08e-09	10.9409
EVI2B	-1.1134	1.94894	-6.18857	1.43e-09	6.08e-09	10.9407
KRT19	-3.03497	1.04009	-6.18232	1.48e-09	6.29e-09	10.9053
RASL11A	-1.24592	2.05861	-6.18202	1.48e-09	6.29e-09	10.9036
S100A10	1.04045	6.5702	6.1801	1.5e-09	6.36e-09	10.8927
CFD	-1.25271	1.85826	-6.177	1.53e-09	6.47e-09	10.8752
SMIM24	-2.95097	0.879705	-6.17686	1.53e-09	6.47e-09	10.8744
DOK6	-1.66432	-0.831651	-6.17631	1.53e-09	6.49e-09	10.8713
CYBRD1	-1.25876	3.89759	-6.17432	1.55e-09	6.56e-09	10.86
CYP27B1	1.25129	-0.639758	6.17184	1.57e-09	6.65e-09	10.846
TMEM136	1.07067	0.963038	6.16349	1.65e-09	6.97e-09	10.7989
ANGPT2	1.06141	2.24584	6.16206	1.67e-09	7.02e-09	10.7907
NR0B2	-1.68107	5.26125	-6.15981	1.69e-09	7.11e-09	10.7781
HMGCS2	-1.81678	9.60299	-6.15223	1.76e-09	7.42e-09	10.7353
IRAK3	-1.09982	1.01089	-6.15161	1.77e-09	7.44e-09	10.7318
NLRP3	-1.07775	-0.062986	-6.15124	1.77e-09	7.45e-09	10.7297
VSIG2	-1.83891	0.0283923	-6.14895	1.8e-09	7.54e-09	10.7168
TRMT9B	-1.82755	0.18121	-6.14865	1.8e-09	7.55e-09	10.7151
C1QA	-1.25054	6.24449	-6.14607	1.83e-09	7.66e-09	10.7006
SLC30A4	-1.19904	1.59934	-6.13903	1.9e-09	7.96e-09	10.6609
FYB2	-1.49557	2.60275	-6.13761	1.92e-09	8.02e-09	10.653
DPYS	-2.07692	7.05776	-6.12941	2.01e-09	8.39e-09	10.6068
GALNT3	-1.50435	-0.496104	-6.12863	2.02e-09	8.43e-09	10.6024
FAM9B	-1.84188	-1.22122	-6.12861	2.02e-09	8.43e-09	10.6023
TREM2	1.49746	1.33304	6.12819	2.03e-09	8.44e-09	10.6
TREH	-2.00487	0.675886	-6.12523	2.06e-09	8.59e-09	10.5833
SLC14A1	-1.32035	-0.515608	-6.12127	2.11e-09	8.78e-09	10.5611
SLC2A9	-1.73627	3.21746	-6.1167	2.17e-09	9.01e-09	10.5354
ACSM2A	-2.11517	6.75931	-6.11108	2.24e-09	9.3e-09	10.5039
A1CF	-1.20933	7.23995	-6.10917	2.26e-09	9.4e-09	10.4932
DGAT2	-1.45736	6.78684	-6.10881	2.27e-09	9.41e-09	10.4911
ARID3A	1.48025	2.81118	6.10104	2.37e-09	9.83e-09	10.4477
SAA2	-3.32978	4.9598	-6.10032	2.38e-09	9.86e-09	10.4436
MPP3	1.2609	0.355511	6.0977	2.42e-09	1e-08	10.4289
RIPOR2	-1.13293	1.26402	-6.09662	2.43e-09	1.01e-08	10.4229
SMOC1	-1.10158	6.09616	-6.08748	2.56e-09	1.06e-08	10.3718
ABCA6	-1.63653	5.504	-6.08361	2.62e-09	1.08e-08	10.3502
SELL	-1.13099	1.69748	-6.08003	2.67e-09	1.1e-08	10.3302
CUZD1	1.09301	-1.92903	6.07982	2.68e-09	1.1e-08	10.329
HYAL1	-1.07204	6.66191	-6.07924	2.69e-09	1.11e-08	10.3258
KRTCAP3	-2.0133	0.947302	-6.0777	2.71e-09	1.11e-08	10.3172
TMEM100	-1.89904	0.237433	-6.07676	2.72e-09	1.12e-08	10.3119
PLEK2	-2.06111	1.90893	-6.07191	2.8e-09	1.15e-08	10.2848
MME	-3.3327	2.31185	-6.07163	2.81e-09	1.15e-08	10.2833
EPHA3	-1.69377	1.18909	-6.07037	2.83e-09	1.16e-08	10.2763
LTBP1	-1.27362	3.84202	-6.06884	2.85e-09	1.17e-08	10.2677
LURAP1L	-1.15132	4.3296	-6.06298	2.95e-09	1.21e-08	10.2351
SSUH2	2.134	0.326423	6.05802	3.03e-09	1.24e-08	10.2074
IGLL5	-2.54163	0.764734	-6.05778	3.04e-09	1.24e-08	10.2061
PRR26	-1.62438	1.75782	-6.05646	3.06e-09	1.25e-08	10.1988
SMC1B	1.6688	-1.56912	6.05408	3.1e-09	1.27e-08	10.1855
CYP27A1	-1.3323	8.66321	-6.05337	3.11e-09	1.27e-08	10.1816
SLC25A15	-1.35692	4.43244	-6.04382	3.29e-09	1.34e-08	10.1285
DMRTA1	-1.47972	2.71928	-6.04307	3.3e-09	1.35e-08	10.1243
CSMD1	2.49877	-1.50002	6.04111	3.34e-09	1.36e-08	10.1135
EPB41L3	-1.15549	1.79744	-6.03964	3.37e-09	1.37e-08	10.1053
CPAMD8	-1.07191	0.11035	-6.0386	3.39e-09	1.38e-08	10.0995
OAT	-1.983	4.36944	-6.03702	3.42e-09	1.39e-08	10.0907
ANO3	-1.84371	-1.32708	-6.03633	3.43e-09	1.39e-08	10.0869
AGMO	-1.31952	5.42422	-6.03422	3.47e-09	1.41e-08	10.0752
ELFN1	-1.96683	2.92248	-6.03303	3.5e-09	1.42e-08	10.0686
CXCL6	-2.71736	-0.0195274	-6.03274	3.5e-09	1.42e-08	10.067
LECT2	-2.71323	4.84822	-6.0312	3.54e-09	1.43e-08	10.0585
PLA2G4C	1.05954	3.85792	6.03105	3.54e-09	1.43e-08	10.0576
GPT2	-1.44909	6.93712	-6.03029	3.55e-09	1.44e-08	10.0534
LAMA2	-1.95052	2.02461	-6.02885	3.58e-09	1.45e-08	10.0454
SDS	-3.08552	6.44628	-6.0266	3.63e-09	1.47e-08	10.0329
RAPH1	-1.17249	1.85486	-6.02614	3.64e-09	1.47e-08	10.0304
DES	-1.78515	-1.07752	-6.02452	3.67e-09	1.48e-08	10.0214
CCL19	-2.4831	0.944469	-6.01863	3.8e-09	1.53e-08	9.9888
CHSY3	-1.12039	0.295587	-6.01267	3.93e-09	1.58e-08	9.95584
SLC16A10	-1.53346	2.19708	-6.01129	3.96e-09	1.59e-08	9.94817
PRF1	-1.14305	2.15589	-6.00928	4.01e-09	1.61e-08	9.93706
GPT	-1.5325	6.11846	-5.99803	4.27e-09	1.71e-08	9.8749
RBP4	-1.56616	11.7745	-5.99719	4.29e-09	1.72e-08	9.8703
FPR3	-1.10098	2.4078	-5.99567	4.33e-09	1.73e-08	9.86189
DUSP2	-1.33045	1.1921	-5.99508	4.34e-09	1.74e-08	9.85863
PIPOX	-1.4998	7.79002	-5.99359	4.38e-09	1.75e-08	9.85043
AOC1	-2.11992	-0.596273	-5.99351	4.38e-09	1.75e-08	9.84995
SLC2A2	-1.86988	7.87828	-5.9852	4.59e-09	1.83e-08	9.80418
SLC6A9	1.36548	1.30722	5.98201	4.68e-09	1.86e-08	9.78659
PPARGC1A	-1.87256	4.80358	-5.98061	4.71e-09	1.88e-08	9.77887
DSG1	-2.29945	1.53361	-5.97981	4.73e-09	1.89e-08	9.77447
TFR2	-1.5137	9.02884	-5.97862	4.77e-09	1.9e-08	9.76793
CA13	-1.09408	1.26633	-5.97775	4.79e-09	1.91e-08	9.76313
PDE4B	-1.21816	2.39836	-5.97406	4.89e-09	1.94e-08	9.74281
AGXT	-2.07143	9.45223	-5.97102	4.98e-09	1.98e-08	9.7261
ANGPTL3	-1.75683	7.77252	-5.96867	5.04e-09	2e-08	9.71319
SALL1	-1.04412	5.18085	-5.96163	5.25e-09	2.07e-08	9.6745
PPP1R1A	-2.30685	4.8555	-5.9611	5.26e-09	2.08e-08	9.67157
CTSV	2.01271	-0.334886	5.95861	5.34e-09	2.11e-08	9.65793
CEL	1.4506	-1.28823	5.95755	5.37e-09	2.12e-08	9.65211
CIART	1.26474	2.15879	5.94954	5.62e-09	2.21e-08	9.60819
STK39	1.40883	2.52668	5.94936	5.62e-09	2.21e-08	9.60719
NTRK2	-1.92566	-0.477697	-5.94892	5.64e-09	2.22e-08	9.60474
SORBS2	-1.03316	6.09997	-5.94514	5.76e-09	2.27e-08	9.58403
ARRDC4	-1.46618	3.80215	-5.94499	5.76e-09	2.27e-08	9.58325
CYP4F12	-1.45244	4.52606	-5.93342	6.15e-09	2.41e-08	9.51988
IL27	-1.48514	1.86384	-5.93065	6.25e-09	2.45e-08	9.50475
HRG	-2.71662	9.71941	-5.93034	6.26e-09	2.45e-08	9.50303
DSEL	-1.48782	1.66337	-5.92319	6.52e-09	2.55e-08	9.46397
ANKRD37	-1.11387	1.62458	-5.92124	6.59e-09	2.57e-08	9.45332
DAB1	-1.61096	1.34325	-5.91788	6.71e-09	2.62e-08	9.43499
MAP7	-1.03651	4.25549	-5.90104	7.38e-09	2.87e-08	9.3432
ECM2	-1.25434	4.05412	-5.89588	7.59e-09	2.95e-08	9.31513
SLC13A5	-2.36228	6.92772	-5.88535	8.06e-09	3.12e-08	9.25787
BEX1	-2.39302	-1.42144	-5.88062	8.27e-09	3.2e-08	9.23219
SAA1	-3.21434	6.80029	-5.88017	8.29e-09	3.21e-08	9.22976
TNFRSF18	1.32631	-0.246807	5.87942	8.33e-09	3.22e-08	9.22569
GFRA1	-2.42083	3.63539	-5.87804	8.39e-09	3.24e-08	9.2182
CYBB	-1.26332	3.3637	-5.87785	8.4e-09	3.24e-08	9.21713
ZP3	1.16355	0.362998	5.87763	8.41e-09	3.24e-08	9.21593
ATP1B2	-1.27534	1.10735	-5.87612	8.48e-09	3.27e-08	9.20773
TXNIP	-1.1021	7.44435	-5.87188	8.68e-09	3.34e-08	9.18478
FMO4	-1.19012	4.10863	-5.87156	8.7e-09	3.35e-08	9.18301
TENM1	-2.28281	0.550786	-5.8665	8.95e-09	3.44e-08	9.15562
DNALI1	-1.58488	2.96618	-5.86435	9.06e-09	3.48e-08	9.14394
COX7B2	2.92746	-1.41689	5.86372	9.09e-09	3.49e-08	9.14055
PRR36	1.4657	-0.178948	5.86355	9.1e-09	3.49e-08	9.13965
CMYA5	-1.34079	1.37812	-5.86055	9.25e-09	3.55e-08	9.12337
PPL	-1.2471	4.04017	-5.8599	9.28e-09	3.56e-08	9.11987
ACSL4	2.04188	6.4976	5.85586	9.5e-09	3.64e-08	9.098
INHBA	-1.39236	2.88927	-5.85582	9.5e-09	3.64e-08	9.09778
ARG1	-2.15259	7.46819	-5.85058	9.78e-09	3.74e-08	9.06948
GJA5	1.17706	2.19307	5.8429	1.02e-08	3.9e-08	9.028
SEMA3E	-2.06558	-2.01979	-5.84179	1.03e-08	3.92e-08	9.02197
GPR183	-1.24571	1.29407	-5.83865	1.04e-08	3.99e-08	9.00504
CAVIN2	-1.22303	3.5899	-5.83644	1.06e-08	4.03e-08	8.9931
C16orf45	-1.14408	3.51505	-5.83547	1.06e-08	4.05e-08	8.98788
SERPINA4	-1.89856	7.15976	-5.83353	1.08e-08	4.09e-08	8.9774
NUDT6	-1.01889	1.71708	-5.83262	1.08e-08	4.11e-08	8.97253
DYDC2	1.87497	-0.704816	5.82824	1.11e-08	4.21e-08	8.94892
ANKS4B	-1.33503	4.15035	-5.82331	1.14e-08	4.32e-08	8.92237
CPS1	-2.75006	9.05623	-5.82135	1.15e-08	4.36e-08	8.91181
TMEM198	1.04471	2.06368	5.81994	1.16e-08	4.39e-08	8.90424
LEPR	-1.81428	6.21209	-5.81701	1.18e-08	4.46e-08	8.88845
GPR162	-1.24599	0.993604	-5.81407	1.2e-08	4.53e-08	8.87266
TRIM22	-1.21925	3.94797	-5.81054	1.22e-08	4.61e-08	8.85369
ITGA2	1.38546	2.09113	5.80462	1.26e-08	4.76e-08	8.82191
DAO	-1.91263	4.83265	-5.80415	1.27e-08	4.77e-08	8.81937
PDIA2	1.95126	-1.71092	5.80084	1.29e-08	4.85e-08	8.80159
AMBP	-1.45523	12.0729	-5.80074	1.29e-08	4.85e-08	8.80103
SSX1	3.05777	-1.19671	5.79728	1.31e-08	4.94e-08	8.78252
MROH2A	-2.31003	0.0511904	-5.79562	1.33e-08	4.98e-08	8.7736
CFHR4	-2.23549	3.95206	-5.79541	1.33e-08	4.99e-08	8.77246
APOC3	-2.04585	11.0444	-5.79387	1.34e-08	5.03e-08	8.76422
ABCB11	-2.36356	3.62029	-5.79365	1.34e-08	5.03e-08	8.76302
GMNC	-1.7042	0.109722	-5.79162	1.36e-08	5.08e-08	8.75218
ITIH1	-1.6327	10.1019	-5.79121	1.36e-08	5.09e-08	8.74995
CCL21	-2.46966	2.43422	-5.79004	1.37e-08	5.12e-08	8.74372
SAA2-SAA4	-2.91329	2.25596	-5.7879	1.38e-08	5.18e-08	8.73224
REEP6	-1.39428	7.63749	-5.78596	1.4e-08	5.24e-08	8.72186
ADHFE1	-1.25029	4.47863	-5.7849	1.41e-08	5.26e-08	8.71619
STC1	1.17297	2.9592	5.78481	1.41e-08	5.26e-08	8.71569
BDH1	-1.36297	6.88831	-5.78249	1.43e-08	5.33e-08	8.70325
PCSK6	-1.2387	6.24211	-5.78052	1.44e-08	5.38e-08	8.69272
ZNF300	1.33791	0.366971	5.77492	1.49e-08	5.54e-08	8.66279
OSBP2	1.13286	1.34519	5.77435	1.49e-08	5.56e-08	8.65972
ANO2	1.37145	-1.36153	5.77352	1.5e-08	5.58e-08	8.65531
GSTA2	-2.8479	5.05726	-5.76865	1.54e-08	5.72e-08	8.62926
CYTIP	-1.22233	1.44066	-5.76856	1.54e-08	5.72e-08	8.62881
COL14A1	-1.64495	3.44775	-5.76445	1.57e-08	5.85e-08	8.60684
CBLN3	-1.14393	0.828907	-5.76339	1.58e-08	5.88e-08	8.60121
VNN3	-1.85583	2.97327	-5.75835	1.63e-08	6.03e-08	8.5743
GALC	-1.05303	3.07675	-5.75761	1.64e-08	6.06e-08	8.57035
SEMA3G	1.02612	2.74649	5.7575	1.64e-08	6.06e-08	8.56977
HABP2	-1.9078	7.67627	-5.75665	1.64e-08	6.08e-08	8.56524
OTC	-2.26394	5.58552	-5.74125	1.79e-08	6.59e-08	8.48324
GAREM2	1.32095	0.292476	5.73744	1.83e-08	6.73e-08	8.46302
[truncated: 709 more rows]
